# Supplementary material for: Education, job position, income or multidimensional indices? Associations between different socioeconomic status indicators and chronic low back pain in a German sample: a longitudinal field study
Source: PubMed Central journal article supplement — BMJ Open. 2018 Apr 28;8(4):e020207. doi: 10.1136/bmjopen-2017-020207 (PMC5931294; doi:10.1136/bmjopen-2017-020207), 2018-04-28
Supplement: bmjopen-2017-020207.draft_revisions.pdf [file bmjopen-2017-020207.draft_revisions.pdf]

# BMJ Open

BMJ Open is committed to open peer review. As part of this commitment we make the peer review history of every article we publish publicly available.

When an article is published we post the peer reviewers' comments and the authors' responses online. We also post the versions of the paper that were used during peer review. These are the versions that the peer review comments apply to.

The versions of the paper that follow are the versions that were submitted during the peer review process. They are not the versions of record or the final published versions. They should not be cited or distributed as the published version of this manuscript.

BMJ Open is an open access journal and the full, final, typeset and author-corrected version of record of the manuscript is available on our site with no access controls, subscription charges or pay-per-view fees (<http://bmjopen.bmj.com>).

If you have any questions on BMJ Open's open peer review process please email [info.bmjopen@bmj.com](mailto:info.bmjopen@bmj.com)

# BMJ Open

## Education, job position, income or multidimensional indices? The influence of different indicators of socioeconomic status on low back pain in a German sample

|                                 |                                                                                                                                                                                                                                                                       |
|---------------------------------|-----------------------------------------------------------------------------------------------------------------------------------------------------------------------------------------------------------------------------------------------------------------------|
| Journal:                        | <i>BMJ Open</i>                                                                                                                                                                                                                                                       |
| Manuscript ID                   | bmjopen-2017-020207                                                                                                                                                                                                                                                   |
| Article Type:                   | Research                                                                                                                                                                                                                                                              |
| Date Submitted by the Author:   | 24-Oct-2017                                                                                                                                                                                                                                                           |
| Complete List of Authors:       | Fliesser, Michael; Universitat Potsdam, Department of Health and Physical Activity<br>De Witt Huberts, Jessie; Universitat Potsdam, Department of Health and Physical Activity<br>Wippert, Pia-Maria; Universitat Potsdam, Department of Health and Physical Activity |
| <b>Primary Subject Heading</b>: | Sociology                                                                                                                                                                                                                                                             |
| Secondary Subject Heading:      | Epidemiology, Public health                                                                                                                                                                                                                                           |
| Keywords:                       | EPIDEMIOLOGY, SOCIAL MEDICINE, PREVENTIVE MEDICINE, PUBLIC HEALTH                                                                                                                                                                                                     |
|                                 |                                                                                                                                                                                                                                                                       |

SCHOLARONE™  
Manuscripts

1  
2  
3 **Education, job position, income or multidimensional indices? The influence of different indicators**  
4 **of socioeconomic status on low back pain in a German sample**  
5  
6  
7

8  
9 Authors: Michael Fliesser<sup>1</sup>, Jessie De Witt Huberts<sup>1</sup>, Pia-Maria Wippert<sup>1</sup>  
10

11 1) Department of Health and Physical Activity, Sociology of Health and Physical Activity, University of  
12 Potsdam, Germany  
13

14  
15  
16  
17  
18  
19 Corresponding author:

20 Michael Fliesser, Sociology of Health and Physical Activity, University of Potsdam,

21 Am Neuen Palais 10, 14469 Potsdam, Germany  
22

23 E-Mail: [fliesser@uni-potsdam.de](mailto:fliesser@uni-potsdam.de)  
24

25 Phone: +49 331 977 4074  
26  
27

28  
29 **Wordcount: 2705**  
30  
31  
32  
33  
34  
35  
36  
37  
38  
39  
40  
41  
42  
43  
44  
45  
46  
47  
48  
49  
50  
51  
52  
53  
54  
55  
56  
57  
58  
59  
60

**ABSTRACT:**

**Objectives:** Comparison of the influence of most common socioeconomic status (SES) indicators (education, job position, income, multidimensional index) on intermitted low back pain in a single sample.

**Design:** Longitudinal observational study

**Setting:** Four medical clinic sides in Germany

**Participants:** 381 people. Inclusion criteria: 1) age 18 to 65, 2) able to understand the meaning of the study and to complete a questionnaire without help.

Exclusion criteria: 1) pregnancy, 2) serious pain syndromes in the last 3 month, 3) inability to stand upright, 4) inability to give sick leave information, 5) signs of serious spinal pathology, 6) not completed all relevant questions needed for the different SES operationalisations.

**Outcome measures:** Intensity of intermitted low back pain (LBP) and disability because of intermitted LBP.

**Results:** Hierarchical linear regression revealed that for LBP intensity the multidimensional index ( $\beta=-0.12$ ,  $p<0.01$ ), job position ( $\beta=0.11$ ,  $p=0.01$ ) and education ( $\beta=-0.10$ ,  $p<0.05$ ) had equally high impacts. Income had no significant influence ( $\beta=0.04$ , n.s.). For LBP disability the multidimensional index ( $\beta=-0.21$ ,  $p<0.01$ ) and job position ( $\beta=0.20$ ,  $p<0.01$ ) had the highest influence. Education ( $\beta=-0.13$ ,  $p<0.01$ ) and income ( $\beta=-0.13$ ,  $p=0.01$ ) had equal but less strong impacts.

**Conclusion:** The results reveal that different indicators have different strong influences on intermitted LBP and therefore should not be treated interchangeably. Job position is the most important single indicator. Prevention and intervention work therefore should focus on the areas influences by job position. In general more research on the relationship between SES and health outcomes is needed.

**STRENGTHS AND LIMITATIONS OF THIS STUDY:**

- The paper expands the analysis of the influence of different indicators of the SES on a subject not yet investigated under this aspect, namely intermitted low back pain.
- Various regression models with the identical sample are performed to highlight how much the predicted influence between SES and the health output may vary if only one SES indicator is taken into account.
- Furthermore the paper introduces a theoretical framework dedicated to support researchers in choosing the most suitable indicator for their research question.
- The results are limited by the fact that the chosen theoretical framework may be too simple.

## 1 BACKGROUND

2 It is widely accepted in health sciences that the socioeconomic status (SES) is linked to many health  
3 outcomes [1]. However, less is known about the causal pathways and mediating factors that lead  
4 from SES to these outcomes. This gap in research seems to be at least partly caused by unresolved  
5 methodological issues concerning the operationalization of SES. Since SES is a latent construct,  
6 various indicators are used to measure a person's SES. The most commonly used indicators are  
7 education, job position, income or combinations of these variables [2]. The decision for a specific SES  
8 indicator is often not adequately justified in articles [3], and they are even used interchangeably [1].  
9 This limits the interpretation of research results: Different operationalizations are based on different  
10 theoretical explanatory models connecting the SES-indicators and health outcomes. Job position for  
11 example is thought to be connected with the amount of stress someone has to face, which may  
12 influence his health, whereas education influences the knowledge someone has about health [4]. As  
13 a consequence, it is very likely that different operationalizations will influence the predicted strength  
14 between SES and a specific health outcome. This indeed has been confirmed for several health  
15 domains such as myocardial infarctions [5], overall mortality [5, 6], diabetes [5] or subjective health  
16 status [7, 8]. From these studies two things are noteworthy: First of all, there is no single SES  
17 indicator that always has the strongest influence on health outcomes. This means that instead of  
18 advocating the use of one SES indicator over another, ideally, separate analyses in every health  
19 domain would be needed to determine which indicators are the most relevant. Secondly, in studies  
20 investigating the link between SES and health outcomes, these differences in influence are rarely  
21 acknowledged [3]. However, if we want to fully understand the relationship between SES and  
22 different health outcomes, we not only need to know whether different indicators differ in influence,  
23 but also try to understand why this is so. Ultimately, this would enable prevention and interventions  
24 efforts to more efficiently target the most relevant factors. In this article these questions will be  
25 addressed in a health domain that has rarely been studied in this context, intermitted low back pain  
26 (LBP).

27 LBP seems a suitable health outcome to take a closer look at it regarding its connection to  
28 SES: It is a mayor public health burden with a worldwide lifetime prevalence of about 39 percent,  
29 whereby about 20 percent of people suffer from chronic low back pain [9]. Moreover, it has a  
30 multidimensional aetiology with interactions between health behaviour [10] and different social [11]  
31 and psychological factors [12]. This makes it very plausible that different SES indicators would lead to  
32 different degrees of influence. However, as with other health outcomes, researchers investigating  
33 the influence of SES on back pain have used a variety of different SES indicators, often without  
34 explaining their choice [3]. To date, one study by Latza and colleagues have compared different SES  
35 indicators and their relative influence on self-reported back pain. They found that education had the

1  
2  
3 36 strongest impact on severe back pain, followed by job position and income [13]. Crucially however,  
4 37 the study did not use identical samples for all their SES predictors, making it difficult to determine  
5  
6 38 whether the observed differences in influences were caused by the SES indicator or by differences in  
7  
8 39 the sample. Therefore, a study that investigates the link between different SES indicators and LBP in  
9  
10 40 a single sample is needed to understand the influence of different SES indicators on back pain.

11 41 For the evaluation of the most important indicator on LBP, a closer look at the factors that  
12  
13 42 mediate the relationship between SES and health outcomes is needed [4]. According to the well-  
14  
15 43 established model of social determinants of health by Brunner and Marmot [14], there are three  
16  
17 44 groups of mediating factors between SES and health: Material factors (e.g. pollution), social and  
18  
19 45 psychological factors (e.g. stress) and health behaviour (e.g. dietary habits). Translating this general  
20  
21 46 model to the current example, prior research has revealed that chronic LBP is strongly associated  
22  
23 47 with social and psychological factors such as depressive symptoms [15] stress [16] or working  
24  
25 48 conditions [17]. Additionally, health behaviour plays an, albeit minor, role [18, 19]. The third group of  
26  
27 49 factors, material factors, have not been found to be associated with chronic LBP in in previous  
28  
29 50 studies. Based on these findings, it can be assumed that the SES indicators that are most closely  
30  
31 51 associated with the two groups of mediating factors related to LBP, social and psychological factors  
32  
33 52 and health behaviour, exert stronger influence on LBP. Hradil, examining the influence of SES  
34  
35 53 indicators on cardiovascular diseases, has proposed such connections between SES indicators and  
36  
37 54 the mediating factors in question [4]: He assumes job position to be strongly connected with social  
38  
39 55 and psychological factors, education with health behaviour and income with material factors.  
40  
41 56 Applying these insights to LBP we hypothesise that job position is most strongly connected with LBP,  
42  
43 57 followed by education. Income should have the weakest influence. The multidimensional index,  
44  
45 58 covering all possible pathways, should be most influential.

## 46 59 47 60 **METHOD**

48 61 **Sample:** Participants were recruited in four medical clinic sides in Germany as part of a large study on  
49  
50 62 low back pain (Medicine in Spine Network, [20]). Inclusion criteria were: 1) age 18 to 65, 2) able to  
51  
52 63 understand the meaning of the study and to complete a questionnaire without help. Exclusion  
53  
54 64 criteria were 1) pregnancy, 2) inability to stand upright, 3) inability to give sick leave information, 4)  
55  
56 65 signs of serious spinal pathology. To ensure homogeneity in the here presented research question, all  
57  
58 66 participants who failed to complete all relevant questions needed for the different SES  
59  
60 67 operationalisations were excluded. Additionally all people who did not have a job at the time of the  
61  
62 68 study were excluded, as it would not be possible to create the indicator job position for them.  
63  
64 69 Furthermore, since new onset of LBP was in the focus of this study, all people who already reported

1  
2  
3  
4  
5  
6  
7  
8  
9  
10  
11  
12  
13  
14  
15  
16  
17  
18  
19  
20  
21  
22  
23  
24  
25  
26  
27  
28  
29  
30  
31  
32  
33  
34  
35  
36  
37  
38  
39  
40  
41  
42  
43  
44  
45  
46  
47  
48  
49  
50  
51  
52  
53  
54  
55  
56  
57  
58  
59  
60

70 serious chronic pain syndromes at baseline were excluded. This led to a final sample of  $N=381$   
71 participants.

72

73 **Testing procedure:** All measurements were performed at medical clinics. After baseline, people were  
74 again questioned 6 month later. Written consent was granted by all participants. The survey was  
75 approved by ethics committee of University of Potsdam (Ethics approval 36/2011) and is in  
76 accordance with the principles of the Declaration of Helsinki.

77

#### 78 **Instruments and data pre-processing:**

79 SES indicators: Socioeconomic status was evaluated at baseline using the following instruments:

80 *Education* was assessed using the International Standard Classification of Education (ISCED), which  
81 combines school and vocational education [21], resulting in a score from 0 (less than primary  
82 education) to 5 (tertiary education).

83 *Job position* was measured using the nine categories of the International Standard Classification of  
84 Occupation (ISCO-08), combining jobs according to main tasks, skill level and specialisation [22].

85 *Monthly net income* was asked using 7 categories (less than 1 250€, 1 250€ to 1 749€, 1 750€ to 2  
86 249€, 2 250€ to 2 999€, 3 000€ to 3 999€, 4 000€ to 4 999€, 5 000€ and more).

87 *Multidimensional SES index* was calculated using the Winkler-Scheuch-Index (WS-index). This index,  
88 recommended by the German Working Group for Social Epidemiology [23], is based on the three  
89 dimensions: education, job position and income. Each person gets a value between 1 and 7 for each  
90 of the single indicators. The total of these three values then determines the person's score in the WS-  
91 index, from 3 (lowest SES) to 21 [23].

#### 92 Pain indicators:

93 *Pain intensity* was evaluated using the Chronic Pain Grade questionnaire (CPG) created by von Korff  
94 [24], asking about the current intensity of pain, the average intensity in the last three months and the  
95 worst experienced pain in the last three months. Answering options ranged from 0 (no pain) to 10  
96 (worst pain possible). The mean of these three questions was calculated and multiplied by 10,  
97 resulting in a score of 0 to 100 for each participant. These variables were collected at baseline and  
98 follow up. Internal consistency was good for both measurement points (baseline: *Cronbach's*  
99 *Alpha*=0.76; follow up: *Cronbach's Alpha*=0.82).

100 *Pain disability* was also evaluated using three questions of the CPG questionnaire asking about how  
101 much the pain interfered with daily activities, recreational and social activities and with work (again  
102 rated on a scale from 0 to 10). The mean of these three questions was calculated and the result  
103 multiplied by 10 resulting in a score from 0 to 100 [24]. Internal consistency was excellent (baseline:  
104 *Cronbach's Alpha*: 0.87; follow up: *Cronbach's Alpha*=0.93).

1  
2  
3 105 *Pain Class*: To enable focussing on new onsets of back pain only, a pain classification index was used  
4 106 at baseline (CPG pain classes). This scale grades pain intensity, pain disability and the number of days  
5 107 with limitations because of pain into 5 categories: 0: no pain; 1 pain with low intensity and low  
6 108 disability; 2 low disability but high intensity; 3 high disability with few days of limitation in everyday  
7 109 life; 4 high disability with severe limitation in everyday life [24]. For the present study, only  
8 110 participants with pain class 0 or 1 at baseline were included.  
9  
10  
11  
12

111

13  
14 112 Statistical analysis: After descriptives, four hierarchical regression analyses were conducted for each  
15 113 pain outcome using either education, job position, monthly net income or the multidimensional  
16 114 index as the respective predictors while controlling for age, sex and pain at baseline. Requirements of  
17 115 the regression analysis were tested with collinearity diagnosis, Durbin-Watson test and Kolmogorov  
18 116 Smirnov test for normality of residuals. All analyses were performed with IBM SPSS Statistics 21.  
19  
20  
21  
22

117

## 118 RESULTS

23  
24 119 **Descriptives**: Looking at the characteristics of the sample Table 1 reveals that respondents (55.1  
25 120 percent women) were on average middle-aged, covering the whole spectrum of the age range. On  
26 121 average participants were highly educated and held high job positions. The average income in the  
27 122 sample was between 1750 and 2249 Euros and the WS-index was on average 14.9 on the scale from  
28 123 3 to 21. Pain intensity and disability was low at t0 and t1.  
29  
30  
31  
32  
33

124

34  
35 125 Table 1: Characteristics of study sample (N=381):  
36

| Variable (range)                        | M    | SD   | MIN. | MAX. |
|-----------------------------------------|------|------|------|------|
| Age (18 to 65)                          | 41.0 | 11.8 | 19   | 65   |
| Education (1 to 5)                      | 4.1  | 0.9  | 1    | 5    |
| Jobposition (1 to 9)                    | 3.3  | 2.0  | 1    | 9    |
| Income (1 to 7)                         | 3.3  | 1.8  | 1    | 7    |
| Winkler-Scheuch Index (3 to 21)         | 14.9 | 2.9  | 8.2  | 20.4 |
| CPG pain intensity baseline (0 to 100)  | 21.0 | 13.8 | 0    | 47   |
| CPG pain intensity follow up (0 to 100) | 19.4 | 16.7 | 0    | 67   |
| CPG disability baseline 0 to 100)       | 9.9  | 12.7 | 0    | 63   |
| CPG disability follow up (0 to 100)     | 9.7  | 15.6 | 0    | 90   |
| CPG pain class baseline                 | 0.9  | 0.3  | 0    | 1    |

126

## 127 Regression models:

37  
38  
39  
40  
41  
42  
43  
44  
45  
46  
47  
48  
49  
50  
51  
52  
53  
54  
55  
56 127  
57 128 Starting with the models for the prediction of pain intensity (Table 2), three SES indicators (namely  
58 129 education, job position and the WS-index) were able to explain significant variance. Comparing the  
59  
60



130 strength of these respective SES indicators, the ranking is as follows: WS-index (beta=-0.12), job  
 131 position (beta=0.11) and education (beta=-0.10). People with higher overall SES, higher job positions  
 132 and higher education experience on average less intense pain. Change in  $R^2$  due to these variables  
 133 vary between 0.012 (job position and WS-index) and 0.009 (education). Income showed no  
 134 significant influence. The high absolute  $R^2$  is partly caused by the strong impact of the control  
 135 variable pain intensity at first measurement point (highly significant beta of 0.53, not indicated in the  
 136 table).

137  
 138 Table 2: Hierarchical regression models predicting influence of different operationalisations of SES on CPG pain intensity  
 139 score (higher values more pain), controlled for age, sex and baseline pain intensity ( $N=381$ ):

| MODEL | SES INDICATOR | $R^2$ | $\Delta R^2$ | BETA  | T-VALUE | P       |
|-------|---------------|-------|--------------|-------|---------|---------|
| 1     | Education     | 0.32  | 0.009*       | -0.10 | -2.29   | 0.02*   |
| 2     | Job position  | 0.32  | 0.012*       | 0.11  | 2.57    | 0.01*   |
| 3     | Income        | 0.31  | 0.002        | -0.04 | -0.91   | 0.36    |
| 4     | WS-index      | 0.32  | 0.012*       | -0.12 | -2.63   | <0.01** |

140 \* =  $p < 0.05$ ; \*\* =  $p < 0.01$

141  
 142 The situation is different for the models for pain disability (Table 3). All four predictor variables exert  
 143 significant influence on disability. Moreover, they all had a higher impact in comparison to their  
 144 impact on pain intensity. The strongest predictor was the WS-index (beta=0.21), followed by job  
 145 position (beta=0.20), education (beta=-0.13) and income (beta=-0.13): People with higher combined  
 146 socioeconomic status, higher job position, higher education and higher income report on average  
 147 less disability because of pain. Change in  $R^2$  varies between 0.039 (WS-index) and 0.014 (income).

148  
 149 Table 3: Hierarchical regression models predicting influence of different operationalisations of SES on CPG disability (higher  
 150 values, more disability), controlled for age, sex and baseline pain intensity ( $N=381$ ):

| MODEL | SES INDICATOR | $R^2$ | $\Delta R^2$ | BETA  | T-VALUE | P       |
|-------|---------------|-------|--------------|-------|---------|---------|
| 1     | Education     | 0.14  | 0.017*       | -0.13 | -2.77   | <0.01** |
| 2     | Job           | 0.16  | 0.038*       | 0.20  | 4.14    | <0.01** |
| 3     | Income        | 0.14  | 0.014*       | -0.13 | -2.48   | 0.01*   |
| 4     | WS-index      | 0.16  | 0.039*       | -0.21 | -4.20   | <0.01** |

151 \* =  $p < 0.05$ ; \*\* =  $p < 0.01$

## 152 153 DISCUSSION

154 The purpose of this study was to evaluate whether the influence of SES on intermitted LBP changes  
 155 as a function of the used SES indicator.

1  
2  
3 156 It was found that there are indeed differences in the predictive power of commonly used SES  
4 157 indicators. Although it is unlikely to overlook the connection between SES and back pain completely  
5  
6 158 (since all indicators except for income on pain intensity exert significant influence), there were  
7  
8 159 differences in the predictive strength of the SES indicators for pain disability, which could mean that  
9  
10 160 the SES predictor should be selected carefully in order to not underestimate the influence of SES on  
11  
12 161 back pain. Based on the results of this study, it appears that job position would be the most  
13  
14 162 appropriate SES indicators to use in studies on intermitted low back pain. In general however, only  
15  
16 163 income could be clearly identified as suboptimal predictor. In this respect the current findings differ  
17  
18 164 from studies in other health domains that compared the relative impact of SES predictors. For  
19  
20 165 example Geyer and colleagues [5] found education to be a much stronger predictor for diabetes than  
21  
22 166 job position and income to predict better overall mortality than education and job position, whereas  
23  
24 167 Miech and colleagues [7] revealed education as stronger predictors for subjective health than  
25  
26 168 education. This was not confirmed by Geyer [8], who found income and job position to influence  
27  
28 169 subjective health stronger than education. This emphasizes the importance of rethinking possible  
29  
30 170 pathways between SES indicators and health for every health outcome in question.

31  
32 171 With regard to predicting the relative influence of the various SES predictors, the findings only  
33  
34 172 partially support the predicted associations. Starting with pain intensity, it was hypothesized that the  
35  
36 173 multidimensional index and job position, followed by education should be the most influential  
37  
38 174 predictor, whereas income should play no or just a small role. As predicted, income shows no  
39  
40 175 significant influence and is not able to predict pain intensity. But other than assumed, the  
41  
42 176 multidimensional index ( $\beta=-0.12$ ), job position ( $\beta=0.11$ ) and education ( $\beta=-0.09$ ), are  
43  
44 177 (nearly) equally strong predictors for pain intensity. The reason for this may be that the model was  
45  
46 178 oversimplifying when assigning the SES indicators to separate mediating pathways (e.g. job position  
47  
48 179 exclusively to psychosocial, and education exclusively to health behaviour). Education also influences  
49  
50 180 psychosocial conditions and job position also affects health behaviour as prior research has shown  
51  
52 181 [25, 26]. Finally, a priori it was assumed that the WS-index, combining the influences of the single  
53  
54 182 indicators should have significantly more impact. This was not the case in the present study. It  
55  
56 183 appears that the impact of the single dimensions do not necessarily add up in such a way that people  
57  
58 184 scoring high in more than one dimension have a remarkably lower risk of developing back pain and  
59  
60 185 people scoring low a higher risk, something Geyer [8] already showed in a different health domain.  
186 The reason for this may be the inter-relatedness of the indicators and the mediating factors, leading  
187 to a shared influence on back pain for all indicators.

188 For the outcome pain disability, the results are again only partly in line with the hypothesis:  
189 First of all, job position ( $\beta=0.20$ ) is, as expected, the strongest predictor out of the single  
190 indicators, but the multidimensional index ( $\beta=-0.21$ ) is as strong. Again it appears to be wrong to

1  
2  
3 191 assume that the impact of the single dimensions simply will add up. With regard to education ( $\beta=$   
4 192 0.13), the results are in line with the assumptions: Education predicts pain disability, but not as well  
5  
6 193 as job position or the WS-index. Income ( $\beta=-0.13$ ) has, other than expected, also a significant  
7  
8 194 influence on pain disability. Here the assumption that material factors play no role for pain disability  
9  
10 195 seems to be wrong: a possible explanation may be that a higher income enables people to acquire  
11 196 material resources which reduce their disability in everyday life.

12  
13 197 To our knowledge this is the first study that has compared the predictive strength of various  
14 198 SES indicators on intermitted LBP in a single sample, thereby adding to the literature that advocates a  
15  
16 199 critical and careful selection of SES indicators. While the results of this and other studies suggest that  
17  
18 200 the SES indicator should be carefully selected and should not be used interchangeably, it has proven  
19  
20 201 to be difficult to predict beforehand which SES indicator will be the most appropriate. In this study  
21 202 the pathways described in the model by Brunner and Marmot [14] was used to predict the influence  
22 203 of the various SES indicators, however the findings were not fully in line with these predictions. A  
23  
24 204 reason for this may be that the predictions were based on a simplified reflection of reality, assuming  
25  
26 205 no intercorrelations between the different variables.

27 206 Nonetheless, since the article stresses the importance of careful SES indicator selection,  
28  
29 207 further research should aim to develop frameworks to aid researchers in selecting the appropriate  
30  
31 208 SES indicator for their research question. Ultimately such frameworks will help to improve the  
32  
33 209 understanding of the link between SES and health.

34 210  
35  
36  
37  
38  
39  
40  
41  
42  
43  
44  
45  
46  
47  
48  
49  
50  
51  
52  
53  
54  
55  
56  
57  
58  
59  
60

1  
2  
3 211 **AUTHOR CONTRIBUTION**

4 212 All authors substantially contributed to the conception and realization of this article. MF conceived  
5  
6 213 and wrote the first draft of this manuscript and provided the statistical analysis. JW and PW revised  
7  
8 214 the manuscript. PW was responsible for the psychometric design, analysis plan and conceived the  
9  
10 215 social methods of the study. All authors read and approved the final manuscript.

11 216

12 217 **COMPETING INTERESTS:**

13  
14 218 The authors declare that they have no competing interests.

15 219

16  
17 220 **FINANCIAL SUPPORT/FUNDING**

18  
19 221 This study is funded by the German Federal Institute of Sport Science on behalf of the Federal  
20  
21 222 Ministry of the Interior of Germany. It is conducted within MiSpEx – the National Research Network  
22  
23 223 for Medicine in Spine Exercise (grant-number: 080102A/11-14). The funder did not affect data  
24  
25 224 collection or the content of this manuscript.

26  
27 225

28  
29 226 **ETHICAL APPROVAL**

30  
31 227 The study was approved by the Independent ethics committee of University of Potsdam (Ethics  
32  
33 228 approval 36/2011).

34 229

35  
36 230 **DATA SHARING:**

37  
38 231 No additional data available

39 232

40  
41 233 **ACKNOWLEDGEMENTS**

42  
43 234 Thanks go to the network principal investigator Frank Mayer and researchers of the MiSpEx network  
44  
45 235 namely Adamantios Arampatzis, Marcus Schiltewolf, Heidrun Beck who were involved in the  
46  
47 236 planning and conducting of this study. We prospectively thank both the technical and medical staff at  
48  
49 237 study sites for their investment during study conduction. We further thank Heather Williams and  
50  
51 238 Michael Rector for valuable support by linguistic innovations and suggestions.

52 239

53

54

55

56

57

58

59

60

## REFERENCES

- 1 Cundiff JM, Uchino BN, Smith TW, et al. Socioeconomic status and health: education and income are independent and joint predictors of ambulatory blood pressure. *J Behav Med* 2015;38(1):9–16.
- 2 Nocon M, Keil T, Willich SN. Education, income, occupational status and health risk behaviour. *J Public Health* 2007;15(5):401–05.
- 3 Fliesser M, Klipker K, Wippert P-M. Zur Verwendung des sozioökonomischen Status in der Gesundheitsforschung am Beispiel Rückenschmerz - systematisches Review. *Gesundheitswesen* 2016.
- 4 Hradil S. Was prägt das Krankheitsrisiko- Schicht, Lage, Lebensstil? In: Richter M, Hurrelmann K, eds. *Gesundheitliche Ungleichheit: Grundlagen, Probleme, Perspektiven*, 2nd edn. Wiesbaden: VS, Verl. für Sozialwiss 2009:33–52.
- 5 Geyer S, Hemström O, Peter R, et al. Education, income, and occupational class cannot be used interchangeably in social epidemiology. Empirical evidence against a common practice. *J Epidemiol Community Health* 2006;60(9):804–10.
- 6 Stringhini S, Dugravot A, Kivimaki M, et al. Do different measures of early life socioeconomic circumstances predict adult mortality? Evidence from the British Whitehall II and French GAZEL studies. *J Epidemiol Community Health* 2011;65(12):1097–103.
- 7 Miech RA, Hauser RM. Socioeconomic Status and Health at Midlife: A Comparison of Educational Attainment with Occupation-Based Indicators. *Annals of Epidemiology* 2001;11(2):75–84.
- 8 Geyer S. Einzelindikator oder Index? Masse sozialer Differenzierung im Vergleich. *Gesundheitswesen* 2008;70(5):281–88.
- 9 Hoy D, Bain C, Williams G, et al. A systematic review of the global prevalence of low back pain. *Arthritis Rheum* 2012;64(6):2028–37.
- 10 van Hecke O, Torrance N, Smith BH. Chronic pain epidemiology - where do lifestyle factors fit in? *Br J Pain* 2013;7(4):209–17.
- 11 Goldberg DS, McGee SJ. Pain as a global public health priority. *BMC Public Health* 2011;11:770.
- 12 van Hecke O, Torrance N, Smith BH. Chronic pain epidemiology and its clinical relevance. *Br J Anaesth* 2013;111(1):13–18.
- 13 Latza U, Kohlmann T, Deck R, et al. Influence of Occupational Factors on the Relation Between Socioeconomic Status and Self-Reported Back Pain in a Population-Based Sample of German Adults With Back Pain. *Spine* 2000;25(11):1390–97.
- 14 Brunner G, Marmot MG. Social organisation, stress, and health. In: Marmot MG, Wilkinson RG, eds. *Social determinants of health*, 2nd edn. Oxford, New York: Oxford University Press 2011:6–30.
- 15 Bair MJ, Robinson RL, Katon W, et al. Depression and pain comorbidity: A literature review. *Arch Intern Med* 2003;163(20):2433–45.
- 16 Hoy D, Brooks P, Blyth F, et al. The Epidemiology of low back pain. *Best Pract Res Clin Rheumatol* 2010;24(6):769–81.
- 17 Chou R, Shekelle P. Will this patient develop persistent disabling low back pain? *JAMA* 2010;303(13):1295–302.
- 18 Brox JJ, Storheim K, Holm I, et al. Disability, pain, psychological factors and physical performance in healthy controls, patients with sub-acute and chronic low back pain: a case-control study. *J Rehabil Med* 2005;37(2):95–99.
- 19 Melloh M, Elfering A, Egli Presland C, et al. Identification of prognostic factors for chronicity in patients with low back pain: a review of screening instruments. *Int Orthop* 2009;33(2):301–13.

- 1  
2  
3 20 Wippert P-M, Puschmann A-K, Drießlein D, et al. Development of a Risk Stratification Index and  
4 a Risk Prevention Index for chronic low back pain in primary care. Focus: yellow flags (MiSpEx  
5 Network). *PAIN-Reports* pub. ahead.  
6  
7 21 UNESCO. International standard classification of education: ISCED 2011. Montreal, Quebec:  
8 UNESCO Institute for Statistics 2012.  
9  
10 22 Statistik Austria. ISCO 08- gemeinsame deutschsprachige Titel und Erläuterungen 2011.  
11 Available at:  
12 [http://www.statistik.at/wcm/idc/idcplg?IdcService=GET\\_PDF\\_FILE&dDocName=049974](http://www.statistik.at/wcm/idc/idcplg?IdcService=GET_PDF_FILE&dDocName=049974).  
13  
14 23 Lampert T, Kroll LE, Müters S, et al. Messung des sozioökonomischen Status in der Studie  
15 "Gesundheit in Deutschland aktuell" (GEDA). *Bundesgesundheitsblatt Gesundheitsforschung*  
16 *Gesundheitsschutz* 2013;56(1):131–43. 23275948.  
17  
18 24 Korff M, Ormel J, Keefe FJ, et al. Grading the severity of chronic pain. *Pain* 1992;50(2):133–49.  
19  
20 25 Gallo LC, Matthews KA. Understanding the association between socioeconomic status and  
21 physical health: Do negative emotions play a role? *Psychological Bulletin* 2003;129(1):10–51.  
22  
23 26 Lipowicz A, Szklarska A, Malina RM. Allostatic load and socioeconomic status in Polish adult  
24 men. *J Biosoc Sci* 2014;46(2):155–67.  
25  
26  
27  
28  
29  
30  
31  
32  
33  
34  
35  
36  
37  
38  
39  
40  
41  
42  
43  
44  
45  
46  
47  
48  
49  
50  
51  
52  
53  
54  
55  
56  
57  
58  
59  
60

# BMJ Open

**Education, job position, income or multidimensional indices? Associations between different socioeconomic status indicators and intermitted low back pain in a German sample: a longitudinal field study**

|                                 |                                                                                                                                                                                                                                                                       |
|---------------------------------|-----------------------------------------------------------------------------------------------------------------------------------------------------------------------------------------------------------------------------------------------------------------------|
| Journal:                        | <i>BMJ Open</i>                                                                                                                                                                                                                                                       |
| Manuscript ID                   | bmjopen-2017-020207.R1                                                                                                                                                                                                                                                |
| Article Type:                   | Research                                                                                                                                                                                                                                                              |
| Date Submitted by the Author:   | 19-Dec-2017                                                                                                                                                                                                                                                           |
| Complete List of Authors:       | Fliesser, Michael; Universitat Potsdam, Department of Health and Physical Activity<br>De Witt Huberts, Jessie; Universitat Potsdam, Department of Health and Physical Activity<br>Wippert, Pia-Maria; Universitat Potsdam, Department of Health and Physical Activity |
| <b>Primary Subject Heading</b>: | Sociology                                                                                                                                                                                                                                                             |
| Secondary Subject Heading:      | Epidemiology, Public health                                                                                                                                                                                                                                           |
| Keywords:                       | EPIDEMIOLGY, SOCIAL MEDICINE, PREVENTIVE MEDICINE, PUBLIC HEALTH                                                                                                                                                                                                      |
|                                 |                                                                                                                                                                                                                                                                       |

SCHOLARONE™  
Manuscripts

Only

1  
2  
3 **Education, job position, income or multidimensional indices? Associations between different**  
4 **socioeconomic status indicators and intermitted low back pain in a German sample: a longitudinal**  
5 **field study**  
6  
7  
8  
9

10 Authors: Michael Fliesser<sup>1</sup>, Jessie De Witt Huberts<sup>1</sup>, Pia-Maria Wippert<sup>1</sup>

11 1) Department of Health and Physical Activity, Sociology of Health and Physical Activity, University of  
12 Potsdam, Germany  
13  
14

15  
16  
17  
18  
19  
20 Corresponding author:

21 Michael Fliesser, Sociology of Health and Physical Activity, University of Potsdam,

22 Am Neuen Palais 10, 14469 Potsdam, Germany

23 E-Mail: [fliesser@uni-potsdam.de](mailto:fliesser@uni-potsdam.de)

24 Phone: +49 331 977 4074  
25  
26  
27  
28  
29

30 **Word count: 3566**  
31  
32  
33  
34  
35  
36  
37  
38  
39  
40  
41  
42  
43  
44  
45  
46  
47  
48  
49  
50  
51  
52  
53  
54  
55  
56  
57  
58  
59  
60



**ABSTRACT:**

**Objective:** Investigation of associations between common socioeconomic status (SES) indicators (education, job position, income, multidimensional index) on intermitted low back pain (LBP) in a single sample.

**Design:** Longitudinal field study

**Setting:** Four medical clinics across Germany

**Participants:** 352 people. Inclusion criteria: 1) age 18 to 65, 2) able to understand the meaning of the study and to complete a questionnaire without help.

Exclusion criteria: 1) pregnancy, 2) inability to stand upright, 3) inability to give sick leave information, 4) signs of serious spinal pathology, 5) not completed all relevant questions needed for the different SES operationalisations and 6) serious pain syndromes in the last 3 months.

**Outcome measures:** Intensity of intermitted LBP and disability due to intermitted LBP.

**Results:** Hierarchical linear regression of four different models for each dependent variable revealed job position to be the best predictor for LBP intensity followed by the multidimensional index, whereas education and income had no impact. For LBP disability, again job position proved the best predictor followed by the multidimensional index and education, while income had no significant association.

**Conclusion:** The results revealed that several SES indicators have strong, but different associations with intermitted LBP and are therefore not interchangeable. Job position was found to be the single most important indicator. Prevention and interventions should thus focus on areas influenced by job position. In general, more research on the relationship between SES and health outcomes is needed.

**STRENGTHS AND LIMITATIONS OF THIS STUDY:**

- The extension of SES indicator analysis to a new patient pathology, namely intermitted low back pain (LBP).
- The comparison of various regression models performed on the identical sample to highlight exact variations in the predicted associations between SES and LBP.
- Results could be limited due to the relatively small group sizes and because only four SES indicators were taken into account.
- Transferability of results to other health settings and countries still has to be proven.
-

## 1 BACKGROUND

2 It is widely accepted in health sciences that socioeconomic status (SES) is linked to many health  
3 outcomes [1]. However, less is known about the causal pathways and mediating factors that lead  
4 from SES to these outcomes. This gap in research seems to be at least partly caused by unresolved  
5 methodological issues concerning the operationalization of SES. Because SES is a latent construct,  
6 various indicators are used to measure a person's SES. The most commonly used indicators are  
7 education, job position, income or combinations of these variables [2]. The justification for using a  
8 specific SES indicator is often not adequately justified in articles [3], and they are even used  
9 interchangeably [4]. This limits the interpretation of research results: Different operationalizations  
10 are based on different theoretical explanatory models connecting SES-indicators and health  
11 outcomes. Job position, for example, is thought to be connected with stress, which may influence  
12 health, whereas education influences knowledge about health [5]. As a consequence, it is very likely  
13 that different operationalizations will influence the predicted association between SES and a specific  
14 health outcome. This has indeed been confirmed for several health domains such as myocardial  
15 infarctions [6], overall mortality [6, 7], diabetes [6] and subjective health status [8, 9]. From these  
16 studies, two things are noteworthy. First, there is no single SES indicator that always has the  
17 strongest influence on health outcomes. This means that instead of advocating the use of one SES  
18 indicator over another, ideally, separate analyses in every health domain would be needed to  
19 determine which indicators are the most relevant. Secondly, in studies investigating the link between  
20 SES and health outcomes, these differences in influence are rarely acknowledged [3]. However, if we  
21 want to fully understand the relationship between SES and different health outcomes, we not only  
22 need to know whether different indicators differ in their association, but also to try and understand  
23 why this is so. Ultimately, this would enable prevention and intervention efforts to more efficiently  
24 target the most relevant factors. In this article, these questions will be addressed in a health domain  
25 that has rarely been studied in this context, intermitted low back pain (LBP).

26 LBP seems a suitable health outcome to investigate regarding its connection to SES. LBP is a  
27 major public health burden with a worldwide lifetime prevalence of about 39 %, whereby about 20 %  
28 of people suffer from chronic LBP [10]. Moreover, it has a multidimensional aetiology with  
29 interactions between health behaviour [11] and different social [12] and psychological factors [13].  
30 This makes it very plausible that different SES indicators would lead to different degrees of  
31 association. However, as with other health outcomes, researchers investigating the influence of SES  
32 on back pain have used a variety of different SES indicators, often without explaining their choice [3].  
33 To date, one study by Latza and colleagues compared different SES indicators and their relative  
34 influence on self-reported back pain. They found that education had the strongest impact on severe  
35 back pain, followed by job position and income [14]. However, and this is crucial, the study did not

1  
2  
3 36 use identical samples for all SES predictions, making it difficult to determine whether the observed  
4 37 differences were caused by the SES indicators or by differences in the samples. Therefore, a study  
5 38 investigating the link between different SES indicators and LBP in a single sample is needed to best  
6 39 understand possible associations.

7  
8  
9 40 For evaluation of the most important indicators in LBP, a closer look at the factors mediating  
10 41 the relationship between SES and health outcomes is needed [5]. According to the well-established  
11 42 model of social determinants of health by Brunner and Marmot [15], there are three groups of  
12 43 mediating factors between SES and health: material factors (e.g. pollution), social and psychological  
13 44 factors (e.g. stress) and health behaviour (e.g. dietary habits). Translating this general model to the  
14 45 current example, prior research revealed that chronic LBP is strongly associated with social and  
15 46 psychological factors such as depressive symptoms [16], stress [17] and dissatisfaction with work  
16 47 organisation [18]. Additionally, health behaviour plays a role, albeit minor [19, 20]. The third group of  
17 48 factors, material factors, have not been found to be associated with chronic LBP in previous studies.  
18 49 Based on these findings, it can be assumed that SES indicators most closely associated with social and  
19 50 psychological factors and health behaviour exert stronger influence on LBP. Hradil et al., examining  
20 51 the influence of SES indicators on cardiovascular diseases, assumed job position to be most strongly  
21 52 connected with social and psychological factors, education with health behaviour and income with  
22 53 material factors [5]. Using these assumptions, we hypothesise that from the single indicators job  
23 54 position will be strongly associated with LBP, followed by education. Income, we believe, will have  
24 55 the weakest, if any, association. The multidimensional index, covering all possible pathways, should  
25 56 however yield the greatest predictive power.

26 57

## 27 58 **METHOD**

28 59 **Sample:** Participants were recruited in four medical clinics across Germany as part of a national study  
29 60 on LBP (Medicine in Spine Network, [21]). Inclusion criteria consisted of: 1) age 18 to 65 years, and 2)  
30 61 able to understand the meaning of the study and to complete a questionnaire without help.  
31 62 Exclusion criteria were 1) pregnancy, 2) inability to stand upright, 3) inability to give sick leave  
32 63 information, or 4) signs of serious spinal pathology. This led to a primary sample size of  $N = 1071$   
33 64 participants. To ensure homogeneity and avoid bias, only participants were included, who at the time  
34 65 of study had an actual job position and answered all relevant questions needed for SES  
35 66 operationalisation. This reduced the sample size to  $N=654$ . Furthermore, because prediction of LBP  
36 67 was the focus of this study, participants already reporting serious chronic pain syndromes at baseline  
37 68 were excluded. This led to a sample of  $N = 367$  participants. Finally, since numbers in the groups of  
38 69 primary educated and lower secondary educated people, agricultural workers, machine operators

1  
2  
3 70 and elementary occupations was very small (under 10 people in each group), these groups were  
4 71 excluded from further analysis, leading to a final sample size of  $N=352$ .

5  
6 72  
7 73 **Testing procedure:** All measurements were performed in four Medicine in Spine Network medical  
8 74 clinics. Participants completed questionnaires regarding SES and LBP at baseline and again 6 months  
9 75 later. Written consent was granted by all participants. The study was approved by the University of  
10 76 Potsdam ethics committee (Ethics approval 36/2011) and is in accordance with the principles of the  
11 77 Declaration of Helsinki.

12  
13  
14 78

### 15 79 **Instruments and data pre-processing:**

16  
17 80 SES indicators: Socioeconomic status was evaluated at baseline using the following instruments:

18 81 *Education* was assessed using the International Standard Classification of Education (ISCED), which  
19 82 combines school and vocational education [22], resulting in a score from 0 (less than primary  
20 83 education) to 5 (tertiary education).

21 84 *Job position* was measured using the ten major categories from the International Standard  
22 85 Classification of Occupation (ISCO-08), combining jobs according to main tasks, skill level and  
23 86 specialisation [23].

24 87 Monthly net personal income was surveyed using 7 categories (less than 1,250€, 1,250€ to 1,749€,  
25 88 1,750€ to 2,249€, 2,250€ to 2,999€, 3,000€ to 3,999€, 4,000€ to 4,999€, 5,000€ and more) based on  
26 89 the recommendations of the German Federal Statistical Institute and grouped at the extremes [24].

27 90 *Multidimensional SES index* was calculated using the Winkler-Scheuch-Index (WS-index). This index, a  
28 91 revised version of the German Working Group for Social Epidemiology recommendations [25], is  
29 92 based on three dimensions: education (generated as combination of general and job specific  
30 93 educational level), job position and income. The composition is similar to those of international  
31 94 additive indices. For example Hollighead's "Index of Social Status" [26]. Participants are scored  
32 95 between 1 and 7 for each of the single indicators. The total of these three values then determines  
33 96 the participant's WS-index score [25].

34 97 Pain indicators:

35 98 *Pain intensity* was evaluated using the Chronic Pain Grade questionnaire (CPG) created by von Korff  
36 99 [27], which asks about the current intensity of pain, the average intensity of pain in the last three  
37 100 months and the worst experienced pain in the last three months. Possible answers range from 0 (no  
38 101 pain) to 10 (worst pain possible). The mean of these three questions was calculated and multiplied by  
39 102 10, resulting in a score of 0 to 100 for each participant. These variables were collected at baseline  
40 103 and follow-up 6 months later. Internal consistency was good for both measurement points (baseline:  
41 104 *Cronbach's  $\alpha = 0.76$ ; follow-up: *Cronbach's  $\alpha = 0.82$* ).*

1  
2  
3 105 *Pain disability* was evaluated using three questions from the CPG questionnaire concerning how  
4 106 much pain interfered with daily activities, recreational and social activities and with work (again  
5 107 rated on a scale from 0 to 10). The mean of these three questions was calculated and the result  
6 108 multiplied by 10, resulting in a score from 0 to 100 [27]. Internal consistency was excellent (baseline:  
7 109 *Cronbach's*  $\alpha = 0.87$ ; follow-up: *Cronbach's*  $\alpha = 0.93$ ).

10 110 *Pain Class*: To exclude participants with current strong or disabling LBP, a pain classification index  
11 111 was used at baseline (CPG pain classes). This scale grades pain intensity, pain disability and the  
12 112 number of days with limitations due to of pain into 5 classes: 0: no pain; 1: pain with low intensity  
13 113 and low disability; 2: low disability, but high intensity; 3: high disability with few days of limitation in  
14 114 everyday life; 4: high disability with severe limitation in everyday life [27]. For the present study, only  
15 115 participants from pain classes 0 and 1 at baseline were included.

16 116  
17 117 Statistical analysis: After descriptive statistics, four separate hierarchical regression analyses were  
18 118 conducted for each pain outcome using either education, job position, monthly personal net income  
19 119 or the multidimensional index as the respective predictors, while controlling for age and sex, two  
20 120 variables known for their high predictive value in the development of back pain [28]. Education, job  
21 121 position and income thereby were treated as dummy variables to reflect the categorical character of  
22 122 these variables. As most studies only use single indicators to represent SES, a separate model for  
23 123 each indicator was used here as this allowed for demonstration of how much the association  
24 124 between the different indicators and LBP may vary if the other indicators were not taken into  
25 125 account. Requirements of the regression analysis were tested with collinearity diagnosis, Durbin-  
26 126 Watson test and Kolmogorov Smirnov test for normality of residuals. All analyses were performed  
27 127 with IBM SPSS Statistics 21.

## 28 128 29 129 **RESULTS**

30 130 **Descriptive statistics**: Sample characteristics (Tables 1 and 2) revealed that 55% of respondents were  
31 131 women and on average middle-aged, but ranged from 19 to 65 years. Generally, participants were  
32 132 highly educated, with few people with primary or lower secondary education and held high job  
33 133 positions. The mean monthly net personal income of the sample was between 1,750 and 2,249€ and  
34 134 the average WS-index was 14.9, on the scale from 3 to 21. Pain intensity and disability were both low  
35 135 at baseline and 6-month follow-up. People with primary or lower secondary education, agricultural  
36 136 workers, machine operators and elementary job positions are excluded for further analysis because  
37 137 of the small sample size in the groups.

38 138  
39 139

140

141 Table 1: Characteristics of study sample, categorical variables,  $N = 367$ :

| Variable                              | N   | %    |                           | N   | %    |
|---------------------------------------|-----|------|---------------------------|-----|------|
| <b>EDUCATION</b>                      |     |      | <b>JOB POSITION</b>       |     |      |
| Primary education                     | 4   | 1.1  | Managers                  | 34  | 9.2  |
| Lower secondary education             | 4   | 1.1  | Professionals             | 97  | 26.4 |
| Upper secondary education             | 105 | 28.5 | Technicians               | 124 | 34.0 |
| Post-secondary-non tertiary education | 80  | 21.7 | Clerical Support Workers  | 37  | 10.1 |
| Tertiary education                    | 174 | 47.6 | Service and Sales Workers | 50  | 13.6 |
| <b>INCOME</b>                         |     |      | Agricultural Workers      | 1   | 0.3  |
| Under 1250                            | 60  | 16.3 | Craft Workers             | 16  | 4.3  |
| 1250-1749                             | 74  | 20.4 | Machine Operators         | 3   | 0.8  |
| 1750-2249                             | 59  | 16.0 | Elementary Occupations    | 5   | 1.4  |
| 2250-2999                             | 56  | 15.2 |                           |     |      |
| 3000-3999                             | 65  | 17.7 |                           |     |      |
| 4000-4999                             | 28  | 7.6  |                           |     |      |
| More than 5000                        | 25  | 6.8  |                           |     |      |

142

143 Table 2: Characteristics of study sample, continuous variables,  $N = 367$ :

| Variable (Range)                        | M    | SD   | Min. | Max. |
|-----------------------------------------|------|------|------|------|
| Age (18 to 65)                          | 41.0 | 11.8 | 19   | 65   |
| Winkler-Scheuch Index (3 to 21)         | 14.9 | 2.9  | 8.2  | 20.4 |
| CPG pain intensity baseline (0 to 100)  | 21.0 | 13.8 | 0    | 47   |
| CPG pain intensity follow up (0 to 100) | 19.4 | 16.7 | 0    | 67   |
| CPG disability baseline 0 to 100)       | 9.9  | 12.7 | 0    | 63   |
| CPG disability follow up (0 to 100)     | 9.7  | 15.6 | 0    | 90   |
| CPG pain class baseline                 | 0.9  | 0.3  | 0    | 1    |

144

145 **Regression models:**

146 Regarding the prediction models for pain intensity (Table 3), only 'job position' and 'WS-index'  
 147 significantly improved variance explanation. Comparing variance explanation of the respective SES  
 148 indicators, the ranking was as follows: job position (change in  $R^2 = 0.04$ ,  $p < 0.01$ ), WS-index (change  
 149 in  $R^2 = 0.02$ ,  $p < 0.05$ ), education (change in  $R^2 = 0.02$ , n.s.) and income (change in  $R^2 = 0.01$ , n.s.). In  
 150 detail, the analysis revealed that people with upper secondary education experience, on average,  
 151 greater pain intensity compared to people with tertiary education. Considering job position,

1  
2  
3 152 technicians had significantly lower pain intensity scores compared to managers. Again, no other  
4 153 significant differences were observed. Income did not contribute to variance explanation, nor were  
5  
6 154 there any significant differences between income groups. The multidimensional WS-index (included  
7  
8 155 as a continuous variable) improved the model significantly: People with higher overall SES  
9 156 experienced less back pain.

10 157

12 158 Table 3: Four different hierarchical regression models predicting influence of different operationalisations of SES on CPG  
13 pain intensity score (higher values more pain), controlled for age and sex ( $N=352$ )  $\Delta R^2$  indicates model improvement after  
14 159 application of SES indicator:  
15 160

| Model                                                                             | $\Delta R^2$ | Variable                              | B     | SE B | Beta  | p      |
|-----------------------------------------------------------------------------------|--------------|---------------------------------------|-------|------|-------|--------|
| <b>Model 1:</b><br><b>Education</b><br><b>Reference group: Tertiary Education</b> | 0.01         | Upper Secondary                       | 4.3   | 2.0  | 0.12  | 0.03*  |
|                                                                                   |              | Post-secondary non-tertiary education | 0.76  | 2.2  | 0.02  | 0.73   |
|                                                                                   |              | Professionals                         | -3.6  | 2.0  | -0.1  | 0.13   |
| <b>Model 2 job position</b><br><b>reference group: Manager</b>                    | 0.04**       | Technicians                           | -4.5  | 2.2  | -0.14 | 0.05*  |
|                                                                                   |              | Clerical Support Workers              | -0.36 | 3.2  | -0.01 | 0.91   |
|                                                                                   |              | Service and Sales Workers             | 2.8   | 2.7  | 0.06  | 0.30   |
|                                                                                   |              | Craft Workers                         | 8.5   | 4.5  | 0.11  | 0.06   |
|                                                                                   |              | Under 1250                            | 5.2   | 4.2  | 0.12  | 0.22   |
| <b>Model 3: Income</b><br><b>Reference group: more than 5000€</b>                 | 0.02         | 1250-1749                             | 1.9   | 3.9  | 0.05  | 0.63   |
|                                                                                   |              | 1750-2249                             | 2.1   | 4.0  | 0.05  | 0.61   |
|                                                                                   |              | 2250-2999                             | 5.9   | 3.9  | 0.14  | 0.14   |
|                                                                                   |              | 3000-3999                             | 0.8   | 3.9  | 0.02  | 0.83   |
|                                                                                   |              | 4000-4999                             | 5.0   | 4.5  | 0.09  | 0.27   |
| <b>Model 4: WS-Index</b>                                                          | 0.02*        |                                       | -0.9  | 0.3  | -0.15 | <0.01* |

161 \* $p < 0.05$ ; \*\* $p < 0.01$

162

163 The pain disability models yielded different results (Table 4). Education, job position and WS-index  
164 explained a significant amount of variance. Moreover, they had a greater impact in comparison to  
165 their impact on pain intensity. The strongest predictor was job position (change in  $R^2=0.07$ ,  $p<0.01$ ),  
166 followed by WS-index (change in  $R^2=0.05$ ,  $p<0.01$ ) then education (change in  $R^2=0.02$ ,  $p<0.05$ ).  
167 Income had no significant influence. Further, people with professional, secondary education were



168 significantly more disabled because of back pain compared to people with tertiary education.  
 169 Professionals experienced, in comparison with managers, significant lower impairment, while craft  
 170 workers experienced significantly more. Although the income model did not improve variance  
 171 explanation, people with an income of less than 1,250€ experienced significantly more impairment  
 172 than people with an income over 5000€. In general, people with a higher SES experienced fewer  
 173 limitations due to their back pain.

174

175 Table 4: Four hierarchical regression models predicting influence of different operationalisations of SES on CPG pain  
 176 disability score (higher values more pain), controlled for age and sex ( $N = 352$ ).  $\Delta R^2$  indicates model improvement after  
 177 application of SES indicator:

| Model                     | $\Delta R^2$ | Variable                              | B    | SE B | Beta  | p       |
|---------------------------|--------------|---------------------------------------|------|------|-------|---------|
| <b>Model 1:</b>           |              | Upper Secondary Education             | 5.8  | 2.0  | 0.17  | <0.01** |
| <b>Education</b>          | 0.02*        |                                       |      |      |       |         |
| <b>Reference group:</b>   |              | Post-secondary non-tertiary education | 2.6  | 2.2  | 0.07  | 0.22    |
| <b>Tertiary Education</b> |              |                                       |      |      |       |         |
|                           |              | Professionals                         | -5.2 | 2.0  | -0.16 | <0.01** |
| <b>Model 2 job</b>        |              | Technicians                           | -1.9 | 2.2  | -0.06 | 0.38    |
| <b>position reference</b> | 0.07**       | Clerical Support Workers              | 0.8  | 3.1  | 0.02  | 0.80    |
| <b>group: Manager</b>     |              | Service and Sales Workers             | 2.4  | 2.7  | 0.05  | 0.36    |
|                           |              | Craft Workers                         | 13.1 | 4.4  | 0.17  | <0.01** |
|                           |              | Under 1250                            | 8.8  | 4.1  | 0.20  | 0.03*   |
| <b>Model 3: Income</b>    |              | 1250-1749                             | 4.9  | 3.9  | 0.13  | 0.21    |
| <b>Reference group:</b>   | 0.02         | 1750-2249                             | 4.9  | 4.0  | 0.12  | 0.21    |
| <b>more than 5000€</b>    |              | 2250-2999                             | 4.5  | 3.9  | 0.10  | 0.25    |
|                           |              | 3000-3999                             | 1.3  | 3.9  | 0.03  | 0.73    |
|                           |              | 4000-4999                             | 2.5  | 4.4  | 0.04  | 0.57    |
| <b>Model 4: WS-Index</b>  | 0.05**       |                                       | -1.3 | 0.3  | -0.23 | <0.01** |

178 \* $p < 0.05$ ; \*\* $p < 0.01$

179

## 180 DISCUSSION

181 The purpose of this study was to investigate the associations between common SES indicators and  
 182 intermitted LBP in a single sample and observe changes in association as a function of SES indicator.

183 Differences were indeed found in the predictive power of commonly used SES indicators, which  
 184 means SES predictors should be carefully selected in order not to underestimate the SES influence on  
 185 LBP. Based on these results, it appears that job position is the most appropriate SES indicator for



1  
2  
3 186 studies regarding intermitted LBP. In general however, only income and education for pain intensity  
4 187 could be identified as suboptimal predictor. In this respect, the current findings differ from studies in  
5  
6 188 other health domains comparing the relative impact of SES predictors. For example, Geyer and  
7  
8 189 colleagues [6] found education to be a much stronger predictor for diabetes than job position and  
9  
10 190 income to predict better overall mortality compared to education and job position. Whereas, Miech  
11  
12 191 and colleagues [8] determined education to more strongly predict subjective health than occupation.  
13  
14 192 This was not confirmed by Geyer [9], who found income and job position to have a greater influence  
15  
16 193 on subjective health than education. This emphasizes the importance of rethinking the possible  
17  
18 194 pathways connecting SES indicators and each distinct health outcome in question.  
19  
20 195 With regard to the hypothesized associations the findings are only partly in line. We hypothesized  
21  
22 196 that the multidimensional index and job position, followed by education would be the most  
23  
24 197 influential predictors of pain intensity, whereas income we believed would play little or no role. As  
25  
26 198 predicted, job position was found to be the strongest indicator: In detail, technicians (and  
27  
28 199 tendentially professionals) showed significantly less pain intensity. One reason for this may include  
29  
30 200 that technicians have better awareness and opportunities to adjust or tend to their LBP by reducing  
31  
32 201 work stress, for example. Income, as suggested, showed no significant influence and was not able to  
33  
34 202 predict pain intensity. Education in general did not contribute to variance explanation, although  
35  
36 203 people with upper secondary education did experience significantly more pain than people with  
37  
38 204 tertiary education. We believe, because educated people should have better knowledge, thus  
39  
40 205 judgement to choose adequate (health) behaviours when confronted with pain [5], their pain is  
41  
42 206 reduced.

43  
44 207 Finally, *a priori*, it was assumed the WS-index, combining the influences of the single  
45  
46 208 indicators would have significantly more predictive power. This was not the case in the present study  
47  
48 209 though. It appears the addition of single SES dimensions do not necessarily yield a cumulative  
49  
50 210 increase in predictive power, something Geyer [9] previously showed in a different health domain.  
51  
52 211 The overlapping of indicators and mediating factors could be the problem here, leading to a shared  
53  
54 212 influence on back pain for all indicators, or the effect of one indicator being counterbalanced by  
55  
56 213 another.

57  
58 214 Reviewing SES and pain disability associations, results are again only partially in line with our  
59  
60 215 hypotheses. First, job position was, as expected, the most influential single predictor. Professionals  
216  
217 216 experienced significantly less impairment due to their LBP, while craft workers experienced more. As  
218  
219 217 with pain intensity, we believe professionals have better possibilities to adjust in their work places  
220  
221 218 when experiencing LBP, so that they are not as hampered compared to managers or craft workers.

222  
223 219 The multidimensional index explained the second most variance. Again, it seems wrong to  
224  
225 220 assume that the impact of single dimensions will simply add up, making multidimensional indices

1  
2  
3 221 more influential than single indicators. With regard to education, the results agreed with our  
4 222 assumptions. Education predicted pain disability, but not as well as job position or WS-index. Again,  
5 223 upper secondary educated people experienced stronger impairment than tertiary educated people.  
6 224 Reasons for this may lie in the educated people knowing better how to adjust their everyday life as  
7 225 not avoid their pain.

8  
9  
10 226 Income in general explained no significant part of pain disability variance, although people in  
11 227 the lowest income class reported greater impairment in comparison with those from the highest.  
12 228 Better incomes may enable these people to acquire material resources, which reduce their disability  
13 229 in everyday life.

14  
15  
16  
17 230 To our knowledge this is the first study to compare the predictive strength of various SES  
18 231 indicators on intermitted LBP in a single sample, thereby adding to the literature that advocates a  
19 232 critical and careful selection of SES indicators. While the results of this and other studies suggest SES  
20 233 indicators should be selected carefully and should not be used interchangeably, it has proven difficult  
21 234 to predict *a priori*, which SES indicator will be most appropriate. In this study, the pathways  
22 235 described in the model of Brunner and Marmot [15] was used to predict the association between  
23 236 various SES indicators and intermitted LBP, though findings were not fully in line with these  
24 237 predictions.

25  
26  
27  
28  
29 238 The results presented in this paper are afflicted by some limitations, namely the small group sizes of  
30 239 primary and lower secondary educated people, agricultural workers, machine operators and  
31 240 elementary occupations, leading to the exclusion of these groups. A repetition of the research design  
32 241 with a larger sample would make the results more reliable. Furthermore, the study was conducted in  
33 242 four study centres in different federal states of Germany. Although Germany has comparable  
34 243 numbers to other European countries regarding prevalence and severity rates of pain [29], country  
35 244 specific differences may lead to other results in other countries. Additionally, not all approaches of  
36 245 gauging SES were taken into account. Newer approaches, for example self-assessed socioeconomic  
37 246 status [30, 31] or neighbourhood indicators [3], could improve future studies, but as of yet, no  
38 247 statement can be made as to whether these approaches would have influenced results.

39 248 Nonetheless, this study showed especially job position as an important dimension concerning  
40 249 SES influence on intermittent LBP. Further research aiming to prevent and reduce intermittent LBP  
41 250 should therefore focus on conditions that may be influenced by job positions.

42  
43  
44  
45  
46  
47  
48  
49  
50 251

1  
2  
3 252 **AUTHOR CONTRIBUTION**

4 253 All authors substantially contributed to the conception and realization of this article. MF conceived  
5  
6 254 and wrote the first draft of this manuscript and provided statistical analysis. JW and PW revised the  
7  
8 255 manuscript. PW was responsible for the psychometric design, analysis plan and conceived the social  
9  
10 256 methods of the multicentre study. All authors read and approved the final manuscript.

11 257

12 258 **COMPETING INTERESTS:**

13  
14 259 The authors declare that they have no competing interests.

15 260

16  
17 261 **FINANCIAL SUPPORT/FUNDING**

18  
19 262 This study is funded by the German Federal Institute of Sport Science on behalf of the Federal  
20  
21 263 Ministry of the Interior of Germany. It is conducted within MiSpEx – the National Research Network  
22  
23 264 for Medicine in Spine Exercise (grant-number: 080102A/11-14). The funder did not affect data  
24  
25 265 collection or the content of this manuscript.

26  
27 266

28  
29 267 **ETHICAL APPROVAL**

30 268 The study was approved by the independent ethics committee of University of Potsdam (Ethics  
31  
32 269 approval 36/2011).

33  
34 270

35 271 **DATA SHARING:**

36 272 No additional data available

37  
38 273

39  
40 274 **ACKNOWLEDGEMENTS**

41 275 Thanks go to the network principal investigator Frank Mayer and researchers of the MiSpEx network  
42  
43 276 namely Adamantios Arampatzis, Marcus Schiltewolf, Heidrun Beck, who were involved in the  
44  
45 277 planning and conducting of this study. We prospectively thank both the technical and medical staff at  
46  
47 278 study sites for their investment during study conduction. We further thank Michael Rector and  
48  
49 279 Heather Williams for valuable support by linguistic innovations and suggestions.

50  
51  
52  
53  
54  
55  
56  
57  
58  
59  
60

## REFERENCES

- 1 Braveman PA, Cubbin C, Egerter S, et al. Socioeconomic Status in Health: One Size Does Not Fit All. *JAMA* 2005;294(22):2879–88.
- 2 Nocon M, Keil T, Willich SN. Education, income, occupational status and health risk behaviour. *J Public Health* 2007;15(5):401–05.
- 3 Fliesser M, Klipker K, Wippert P-M. Zur Verwendung des sozioökonomischen Status in der Gesundheitsforschung am Beispiel Rückenschmerz - systematisches Review. *Gesundheitswesen* 2016.
- 4 Cundiff JM, Uchino BN, Smith TW, et al. Socioeconomic status and health: education and income are independent and joint predictors of ambulatory blood pressure. *J Behav Med* 2015;38(1):9–16.
- 5 Hradil S. Was prägt das Krankheitsrisiko- Schicht, Lage, Lebensstil? In: Richter M, Hurrelmann K, eds. *Gesundheitliche Ungleichheit: Grundlagen, Probleme, Perspektiven*, 2nd edn. Wiesbaden: VS, Verl. für Sozialwiss 2009:33–52.
- 6 Geyer S, Hemström O, Peter R, et al. Education, income, and occupational class cannot be used interchangeably in social epidemiology. Empirical evidence against a common practice. *J Epidemiol Community Health* 2006;60(9):804–10.
- 7 Stringhini S, Dugravot A, Kivimaki M, et al. Do different measures of early life socioeconomic circumstances predict adult mortality? Evidence from the British Whitehall II and French GAZEL studies. *J Epidemiol Community Health* 2011;65(12):1097–103.
- 8 Miech RA, Hauser RM. Socioeconomic Status and Health at Midlife: A Comparison of Educational Attainment with Occupation-Based Indicators. *Annals of Epidemiology* 2001;11(2):75–84.
- 9 Geyer S. Einzelindikator oder Index? Masse sozialer Differenzierung im Vergleich. *Gesundheitswesen* 2008;70(5):281–88.
- 10 Hoy D, Bain C, Williams G, et al. A systematic review of the global prevalence of low back pain. *Arthritis Rheum* 2012;64(6):2028–37.
- 11 van Hecke O, Torrance N, Smith BH. Chronic pain epidemiology - where do lifestyle factors fit in? *Br J Pain* 2013;7(4):209–17.
- 12 Goldberg DS, McGee SJ. Pain as a global public health priority. *BMC Public Health* 2011;11:770.
- 13 van Hecke O, Torrance N, Smith BH. Chronic pain epidemiology and its clinical relevance. *Br J Anaesth* 2013;111(1):13–18.
- 14 Latza U, Kohlmann T, Deck R, et al. Influence of Occupational Factors on the Relation Between Socioeconomic Status and Self-Reported Back Pain in a Population-Based Sample of German Adults With Back Pain. *Spine* 2000;25(11):1390–97.
- 15 Brunner G, Marmot MG. Social organisation, stress, and health. In: Marmot MG, Wilkinson RG, eds. *Social determinants of health*, 2nd edn. Oxford, New York: Oxford University Press 2011:6–30.
- 16 Bair MJ, Robinson RL, Katon W, et al. Depression and pain comorbidity: A literature review. *Arch Intern Med* 2003;163(20):2433–45.
- 17 Hoy D, Brooks P, Blyth F, et al. The Epidemiology of low back pain. *Best Pract Res Clin Rheumatol* 2010;24(6):769–81.
- 18 Chou R, Shekelle P. Will this patient develop persistent disabling low back pain? *JAMA* 2010;303(13):1295–302.
- 19 Brox JI, Storheim K, Holm I, et al. Disability, pain, psychological factors and physical performance in healthy controls, patients with sub-acute and chronic low back pain: a case-control study. *J Rehabil Med* 2005;37(2):95–99.

- 1  
2  
3 20 Melloh M, Elfering A, Egli Presland C, et al. Identification of prognostic factors for chronicity in  
4 patients with low back pain: a review of screening instruments. *Int Orthop* 2009;33(2):301–13.  
5 21 Wippert P-M, Puschmann A-K, Drießlein D, et al. Development of a Risk Stratification Index and  
6 a Risk Prevention Index for chronic low back pain in primary care. Focus: yellow flags (MiSpEx  
7 Network). *PAIN-Reports* pub. ahead.  
8 22 UNESCO. International standard classification of education: ISCED 2011. Montreal, Quebec:  
9 UNESCO Institute for Statistics 2012.  
10 23 Statistik Austria. ISCO 08- gemeinsame deutschsprachige Titel und Erläuterungen 2011.  
11 Available at:  
12 [http://www.statistik.at/wcm/idc/idcplg?IdcService=GET\\_PDF\\_FILE&dDocName=049974](http://www.statistik.at/wcm/idc/idcplg?IdcService=GET_PDF_FILE&dDocName=049974).  
13 24 Destatis. Demografische Standards 2017. Available at:  
14 <https://www.destatis.de/DE/Methoden/DemografischeRegionaleStandards/DemografischeStandardsInfo.html>.  
15 25 Lampert T, Kroll LE, Müters S, et al. Messung des sozioökonomischen Status in der Studie  
16 "Gesundheit in Deutschland aktuell" (GEDA). *Bundesgesundheitsblatt Gesundheitsforschung  
17 Gesundheitsschutz* 2013;56(1):131–43. 23275948.  
18 26 Hollinghead AB. Four Factor Index of Social Status. *Yale Journal of Sociology* 2011;8:21–52.  
19 27 Korff M, Ormel J, Keefe FJ, et al. Grading the severity of chronic pain. *Pain* 1992;50(2):133–49.  
20 28 Schepper EIT de, Damen J, van Meurs JBJ, et al. The association between lumbar disc  
21 degeneration and low back pain: The influence of age, gender, and individual radiographic  
22 features. *Spine* 2010;35(5):531–36.  
23 29 Breivik H, Collett B, Ventafridda V, et al. Survey of chronic pain in Europe: prevalence, impact  
24 on daily life, and treatment. *European Journal of Pain* 2006;10(4):287–333.  
25 30 Präg P, Mills MC, Wittek R. Subjective socioeconomic status and health in cross-national  
26 comparison. *Soc Sci Med* 2016;149:84–92.  
27 31 Hoebel J, Müters S, Kuntz B, et al. Messung des subjektiven sozialen Status in der  
28 Gesundheitsforschung mit einer deutschen Version der MacArthur Scale.  
29 *Bundesgesundheitsblatt Gesundheitsforschung Gesundheitsschutz* 2015;58(7):749–57 (accessed  
30 28 Aug 2015).  
31  
32  
33  
34  
35  
36  
37  
38  
39  
40  
41  
42  
43  
44  
45  
46  
47  
48  
49  
50  
51  
52  
53  
54  
55  
56  
57  
58  
59  
60

STROBE Statement—Checklist of items that should be included in reports of *cross-sectional studies*

|                              | Item No | Recommendation                                                                                                                                                                                                                                                                                                                                                                                                                                                                                          |
|------------------------------|---------|---------------------------------------------------------------------------------------------------------------------------------------------------------------------------------------------------------------------------------------------------------------------------------------------------------------------------------------------------------------------------------------------------------------------------------------------------------------------------------------------------------|
| <b>Title and abstract</b>    | 1       | (a) Indicate the study's design with a commonly used term in the title or the abstract<br><a href="#">Check Page 1</a><br>(b) Provide in the abstract an informative and balanced summary of what was done and what was found <a href="#">Check Page 2</a>                                                                                                                                                                                                                                              |
| <b>Introduction</b>          |         |                                                                                                                                                                                                                                                                                                                                                                                                                                                                                                         |
| Background/rationale         | 2       | Explain the scientific background and rationale for the investigation being reported<br><a href="#">Check Pages 3 and 4</a>                                                                                                                                                                                                                                                                                                                                                                             |
| Objectives                   | 3       | State specific objectives, including any prespecified hypotheses <a href="#">Check Page 4</a>                                                                                                                                                                                                                                                                                                                                                                                                           |
| <b>Methods</b>               |         |                                                                                                                                                                                                                                                                                                                                                                                                                                                                                                         |
| Study design                 | 4       | Present key elements of study design early in the paper <a href="#">Check Title and Pages 4, 5, 6</a>                                                                                                                                                                                                                                                                                                                                                                                                   |
| Setting                      | 5       | Describe the setting, locations, and relevant dates, including periods of recruitment, exposure, follow-up, and data collection <a href="#">Check Pages 4 and 5</a>                                                                                                                                                                                                                                                                                                                                     |
| Participants                 | 6       | (a) Give the eligibility criteria, and the sources and methods of selection of participants <a href="#">Check Pages 4 and 5</a>                                                                                                                                                                                                                                                                                                                                                                         |
| Variables                    | 7       | Clearly define all outcomes, exposures, predictors, potential confounders, and effect modifiers. Give diagnostic criteria, if applicable <a href="#">Check Pages 5 and 6</a>                                                                                                                                                                                                                                                                                                                            |
| Data sources/<br>measurement | 8*      | For each variable of interest, give sources of data and details of methods of assessment (measurement). Describe comparability of assessment methods if there is more than one group <a href="#">Check Pages 5 and 6</a>                                                                                                                                                                                                                                                                                |
| Bias                         | 9       | Describe any efforts to address potential sources of bias <a href="#">Check Page 6</a>                                                                                                                                                                                                                                                                                                                                                                                                                  |
| Study size                   | 10      | Explain how the study size was arrived at <a href="#">Check Page 4</a>                                                                                                                                                                                                                                                                                                                                                                                                                                  |
| Quantitative variables       | 11      | Explain how quantitative variables were handled in the analyses. If applicable, describe which groupings were chosen and why <a href="#">Check Page 6</a>                                                                                                                                                                                                                                                                                                                                               |
| Statistical methods          | 12      | (a) Describe all statistical methods, including those used to control for confounding<br><a href="#">Check Page 6</a><br>(b) Describe any methods used to examine subgroups and interactions <a href="#">Not applicable</a><br>(c) Explain how missing data were addressed <a href="#">Check Page 4</a><br>(d) If applicable, describe analytical methods taking account of sampling strategy<br><a href="#">Not applicable</a><br>(e) Describe any sensitivity analyses <a href="#">Not applicable</a> |
| <b>Results</b>               |         |                                                                                                                                                                                                                                                                                                                                                                                                                                                                                                         |
| Participants                 | 13*     | (a) Report numbers of individuals at each stage of study—eg numbers potentially eligible, examined for eligibility, confirmed eligible, included in the study, completing follow-up, and analysed <a href="#">Check Pages 4 and 5</a><br>(b) Give reasons for non-participation at each stage <a href="#">Check Pages 4 and 5</a><br>(c) Consider use of a flow diagram <a href="#">Not used</a>                                                                                                        |
| Descriptive data             | 14*     | (a) Give characteristics of study participants (eg demographic, clinical, social) and information on exposures and potential confounders <a href="#">Check Pages 6 and 7</a><br>(b) Indicate number of participants with missing data for each variable of interest<br><a href="#">Not applicable (all participants with missing data were excluded)</a>                                                                                                                                                |
| Outcome data                 | 15*     | Report numbers of outcome events or summary measures <a href="#">Check Table 2</a>                                                                                                                                                                                                                                                                                                                                                                                                                      |
| Main results                 | 16      | (a) Give unadjusted estimates and, if applicable, confounder-adjusted estimates and their precision (eg, 95% confidence interval). Make clear which confounders were adjusted for and why they were included <a href="#">Check Tables 3 and 4</a>                                                                                                                                                                                                                                                       |

|                          |    |                                                                                                                                                                                                 |
|--------------------------|----|-------------------------------------------------------------------------------------------------------------------------------------------------------------------------------------------------|
|                          |    | (b) Report category boundaries when continuous variables were categorized <b>Check Table 1</b>                                                                                                  |
|                          |    | (c) If relevant, consider translating estimates of relative risk into absolute risk for a meaningful time period <b>Not relevant</b>                                                            |
| Other analyses           | 17 | Report other analyses done—eg analyses of subgroups and interactions, and sensitivity analyses <b>Not applicable</b>                                                                            |
| <b>Discussion</b>        |    |                                                                                                                                                                                                 |
| Key results              | 18 | Summarise key results with reference to study objectives <b>Check Page 9</b>                                                                                                                    |
| Limitations              | 19 | Discuss limitations of the study, taking into account sources of potential bias or imprecision. Discuss both direction and magnitude of any potential bias <b>Check Page 11</b>                 |
| Interpretation           | 20 | Give a cautious overall interpretation of results considering objectives, limitations, multiplicity of analyses, results from similar studies, and other relevant evidence <b>Check Page 12</b> |
| Generalisability         | 21 | Discuss the generalisability (external validity) of the study results <b>Check Page 11</b>                                                                                                      |
| <b>Other information</b> |    |                                                                                                                                                                                                 |
| Funding                  | 22 | Give the source of funding and the role of the funders for the present study and, if applicable, for the original study on which the present article is based <b>Check Page 13</b>              |

\*Give information separately for exposed and unexposed groups.

**Note:** An Explanation and Elaboration article discusses each checklist item and gives methodological background and published examples of transparent reporting. The STROBE checklist is best used in conjunction with this article (freely available on the Web sites of PLoS Medicine at <http://www.plosmedicine.org/>, Annals of Internal Medicine at <http://www.annals.org/>, and Epidemiology at <http://www.epidem.com/>). Information on the STROBE Initiative is available at [www.strobe-statement.org](http://www.strobe-statement.org).

# BMJ Open

**Education, job position, income or multidimensional indices? Associations between different socioeconomic status indicators and chronic low back pain in a German sample: a longitudinal field study**

|                                 |                                                                                                                                                                                                                                                                       |
|---------------------------------|-----------------------------------------------------------------------------------------------------------------------------------------------------------------------------------------------------------------------------------------------------------------------|
| Journal:                        | <i>BMJ Open</i>                                                                                                                                                                                                                                                       |
| Manuscript ID                   | bmjopen-2017-020207.R2                                                                                                                                                                                                                                                |
| Article Type:                   | Research                                                                                                                                                                                                                                                              |
| Date Submitted by the Author:   | 22-Feb-2018                                                                                                                                                                                                                                                           |
| Complete List of Authors:       | Fliesser, Michael; Universitat Potsdam, Department of Health and Physical Activity<br>De Witt Huberts, Jessie; Universitat Potsdam, Department of Health and Physical Activity<br>Wippert, Pia-Maria; Universitat Potsdam, Department of Health and Physical Activity |
| <b>Primary Subject Heading</b>: | Sociology                                                                                                                                                                                                                                                             |
| Secondary Subject Heading:      | Epidemiology, Public health                                                                                                                                                                                                                                           |
| Keywords:                       | EPIDEMIOLGY, SOCIAL MEDICINE, PREVENTIVE MEDICINE, PUBLIC HEALTH                                                                                                                                                                                                      |
|                                 |                                                                                                                                                                                                                                                                       |

SCHOLARONE™  
Manuscripts

Only



1  
2  
3 **Education, job position, income or multidimensional indices? Associations between different**  
4 **socioeconomic status indicators and chronic low back pain in a German sample: a longitudinal field**  
5 **study**  
6  
7  
8  
9

10 Authors: Michael Fliesser<sup>1</sup>, Jessie De Witt Huberts<sup>1</sup>, Pia-Maria Wippert<sup>1</sup>

11 1) Department of Health and Physical Activity, Sociology of Health and Physical Activity, University of  
12 Potsdam, Germany  
13  
14

15  
16  
17  
18  
19  
20 Corresponding author:

21 Michael Fliesser, Sociology of Health and Physical Activity, University of Potsdam,

22 Am Neuen Palais 10, 14469 Potsdam, Germany

23 E-Mail: [fliesser@uni-potsdam.de](mailto:fliesser@uni-potsdam.de)

24  
25  
26 Phone: +49 331 977 4074  
27  
28

29 **Word count: 3457**  
30  
31  
32  
33  
34  
35  
36  
37  
38  
39  
40  
41  
42  
43  
44  
45  
46  
47  
48  
49  
50  
51  
52  
53  
54  
55  
56  
57  
58  
59  
60

**ABSTRACT:**

**Objective:** To investigate associations between socioeconomic status indicators (education, job position, income, multidimensional index) and the genesis of chronic low back pain (CLBP).

**Design:** Longitudinal field study (baseline and 6-month follow-up)

**Setting:** Four medical clinics across Germany

**Participants:** 352 people were included according to the following criteria: 1) between 18 and 65 years of age, 2) intermittent pain, and 3) an understanding of the study and the ability to answer a questionnaire without help. Exclusion criteria were: 1) pregnancy, 2) inability to stand upright, 3) inability to give sick leave information, 4) signs of serious spinal pathology, 5) acute pain in the past 7 days, or 6) an incomplete SES indicators questionnaire.

**Outcome measures:** subjective intensity and disability of CLBP

**Results:** Analysis showed that job position was the best single predictor of CLBP intensity, followed by a multidimensional index. Education and income had no significant association with intensity. Subjective disability was best predicted by job position, succeeded by the multidimensional index and education, while income again had no significant association.

**Conclusion:** The results showed that SES indicators have different strong associations with the genesis of CLBP and should therefore not be used interchangeably. Job position was found to be the single most important indicator. These results could be helpful in the planning of back pain care programs, but in general, more research on the relationship between SES and health outcomes is needed.

**STRENGTHS AND LIMITATIONS OF THIS STUDY:**

- Analysis of different SES indicators and their influence on the genesis of chronic low back pain.
- This comparison was driven by various regression models within the same sample to highlight variations in CLBP prediction when using different SES indicators.
- Limitations include a small and homogeneous sample of above average SES status and the use of only the most common SES indicators, the setting in one country and the focus on one health domain.
- Transferability has to be proven in other health settings and countries.

## 1 BACKGROUND

2 In the health sciences, it is widely accepted that socioeconomic status (SES) is linked to many health  
3 outcomes [1]. However, less is known about the causal pathways and mediating factors that lead to  
4 these outcomes. This gap in research is partially caused by unresolved methodological issues  
5 concerning the operationalization of SES. Because SES is a latent construct, various indicators can be  
6 used to measure a person's SES. The most commonly used indicators are education, job position and  
7 income, or combinations of these variables [2]. The justification for specific SES indicator use is often  
8 not adequately described in articles [3], and some SES indicators are even used interchangeably [4].  
9 This limits the interpretation of results because different indicators are based on different theoretical  
10 models connecting SES-indicators to health outcomes. For example, job position is strongly  
11 connected with stress, which then detrimentally influences health. Whereas, education is strongly  
12 associated with knowledge about health and treatments [5]. It thus becomes obvious that the  
13 chosen indicator will indeed influence the association with specific health outcomes. This has already  
14 been confirmed for several health outcomes, including myocardial infarction [6], overall mortality [6,  
15 7], diabetes [6] and subjective health status [8, 9]. After reviewing these studies, two things become  
16 noteworthy. First, each SES indicator differs in its connection with specific health outcomes, which  
17 leads to the notion that SES indicators should initially be analysed separately for each health domain  
18 of interest. Secondly, in the studies investigating links between SES and health outcomes, it was  
19 rarely acknowledged that different indicators led to different results, nor discussed why [3]. For a  
20 better understanding of the relationship between SES and health improved methodology yielding  
21 more information concerning indicator associations and underlying mechanisms, is needed.  
22 Therefore, the objective of this study was to compare and report the association of common SES  
23 indicators with the genesis of one common global health problem, chronic low back pain (CLBP).

24 CLBP seems a suitable health outcome to investigate regarding its connection to SES. It is a  
25 major public health burden with an international lifetime prevalence of approximately 39 %, whereby  
26 about 20% of people suffer from CLBP [10]. Moreover, the development of chronic pain has a  
27 multidimensional aetiology and is moderated by health behaviour [11], as well as social [12] and  
28 psychological factors [13]. For these reasons, we hypothesize that different SES indicators will lead to  
29 different degrees of association in the genesis of CLBP. However, past studies analysing CLBP and SES  
30 have used a variety of different SES indicators, often without explanation [3]. To date, only one study  
31 from Latza et al. has compared different SES indicators and their relative influence on self-reported  
32 back pain. They found education to have the strongest association with chronic back pain, followed  
33 by job position and income [14]. However, and this is crucial, they did not use identical samples for  
34 all SES prediction calculations. So it is not clear whether the observed differences were caused by the

1  
2  
3 35 SES indicators or by differences in the samples. Hence, a study investigating the link between  
4 36 different SES indicators and CLBP in a single sample is needed.

5  
6 37 Before evaluating, it is important to have a differentiated perspective on factors mediating  
7 38 the relationship between SES and health [5]. According to the well-established model of social  
8 39 determinants of health by Brunner and Marmot [15], there are three groups of factors mediating SES  
9 40 and health: material factors (e.g. pollution), social and psychological factors (e.g. stress) and health  
10 41 behaviour (e.g. dietary habits). Translating this general model to the current example, prior research  
11 42 has revealed that CLBP is most strongly associated with social and psychological factors, such as  
12 43 depressive symptoms [16], stress [17] and dissatisfaction with work organisation [18]. Health  
13 44 behaviour has also been associated with CLBP [19, 20], however, material factors have not. Based on  
14 45 these findings, it could be assumed that SES indicators more closely associated with  
15 46 social/psychological factors and health behaviour will have stronger associations with CLBP. Hradil et  
16 47 al., examining the influence of SES indicators on cardiovascular diseases, assumed job position to be  
17 48 most strongly connected with social and psychological factors, education with health behaviour and  
18 49 income with material factors [5]. Using these assumptions, we hypothesise that the single indicator,  
19 50 job position will be strongly associated with the genesis of CLBP, followed by education. Income, we  
20 51 believe, will have the weakest association. The multidimensional index, covering all possible  
21 52 pathways, should however yield the strongest association.

22 53

## 23 54 **METHOD**

24 55 **Sample:** Participants were recruited from four medical clinics across Germany as part of a national  
25 56 study on LBP (National Research Network for Medicine in Spine Exercise, MiSpEx, [21]). Inclusion  
26 57 criteria consisted of: 1) 18 to 65 years of age, 2) intermittent pain, 3) an understanding of the study  
27 58 and the ability to answer a questionnaire without help. Exclusion criteria were 1) pregnancy, 2)  
28 59 inability to stand upright, 3) inability to give sick leave information, or 4) signs of serious spinal  
29 60 pathology. This led to a primary sample size of  $N = 1071$  participants. To ensure homogeneity and to  
30 61 avoid bias, only participants, who at the time of assessment were actually employed and answered  
31 62 all relevant SES indicator questions, were included. This reduced the sample size to  $N = 654$ .  
32 63 Furthermore, as SES association with the genesis of CLBP is the focus, participants already reporting  
33 64 serious chronic pain syndromes at baseline were excluded, reducing the sample to  $N = 367$   
34 65 participants. After final screening, an insufficient number of some SES groups (primary and lower-  
35 66 secondary educational level, agricultural workers, machine operators and elementary occupations)  
36 67 was observed (under 10 people in each group), therefore these groups were excluded from further  
37 68 analysis, leading to a final sample size of  $N = 352$ .

38 69

1  
2  
3  
4  
5  
6  
7  
8  
9  
10  
11  
12  
13  
14  
15  
16  
17  
18  
19  
20  
21  
22  
23  
24  
25  
26  
27  
28  
29  
30  
31  
32  
33  
34  
35  
36  
37  
38  
39  
40  
41  
42  
43  
44  
45  
46  
47  
48  
49  
50  
51  
52  
53  
54  
55  
56  
57  
58  
59  
60

70 **Testing procedure:** All measurements were performed in the four medical clinics of the MiSpEx  
71 Network. Participants completed questionnaires regarding SES and CLBP at baseline and again six  
72 months later. Written consent was obtained from all participants. The study was approved by the  
73 University of Potsdam ethics committee (Ethics approval 36/2011) and is in accordance with the  
74 principles of the Declaration of Helsinki.

75 **Patient and Public Involvement:** Participants were informed, that the study is about LBP. They were  
76 not involved in the development of the design, recruitment, or study conduction. Each participant  
77 got an individual feedback of his or her results shortly after the study was finished.

78 **Instruments and data pre-processing:**

79 SES indicators: Socioeconomic status was evaluated at baseline using the following instruments:

80 *Education* was assessed using the International Standard Classification of Education (ISCED), which  
81 combines school and vocational education [22], resulting in a score from 0 (less than primary  
82 education) to 5 (tertiary education).

83 *Job position* was measured using the ten major categories from the International Standard  
84 Classification of Occupation (ISCO-08), combining jobs according to main tasks, skill level and  
85 specialisation [23].

86 Monthly net personal income was separated into 7 brackets (less than 1,250€, 1,250€ to 1,749€,  
87 1,750€ to 2,249€, 2,250€ to 2,999€, 3,000€ to 3,999€, 4,000€ to 4,999€, 5,000€ and more) based on  
88 the recommendations of the German Federal Statistical Institute and grouped at the extremes [24].

89 *Multidimensional SES index* was calculated using the Winkler-Scheuch-Index (WS-index). This index, a  
90 revised version of the German Working Group for Social Epidemiology recommendations [25], is  
91 based on three dimensions: education (a combination of general and job specific educational level  
92 obtained together with ISCED), job position (a combination of position and qualification) and income.  
93 The composition is similar to those of international additive indices, for example, Hollighead's "Index  
94 of Social Status" [26]. Participants were scored between 1 and 7 for each of the single indicators. The  
95 total of these three values then determined the participant's WS-index score [25].

96 Pain indicators:

97 *Pain intensity* was evaluated using the Chronic Pain Grade questionnaire (CPG) created by von Korff  
98 [27], which inquires the current intensity of pain, the average intensity of pain in the last three  
99 months and the worst experienced pain in the last three months. Possible answers range from 0 (no  
100 pain) to 10 (worst pain possible). The mean of these three questions was calculated and multiplied by  
101 10, resulting in a score of 0 to 100 for each participant. These variables were collected at baseline  
102 and follow-up 6 months later. Internal consistency was good at both measurement points (baseline:  
103 *Cronbach's*  $\alpha = 0.76$ ; follow-up: *Cronbach's*  $\alpha = 0.82$ ).

1  
2  
3 104 *Pain disability* was evaluated using three questions from the CPG questionnaire concerning how  
4 105 much pain interfered with daily, recreational, social and work activities (again rated on a scale from 0  
5 106 to 10). The mean of these three questions was calculated and the result multiplied by 10, resulting in  
6 107 a score from 0 to 100 [27]. Internal consistency was excellent at both measurement points (baseline:  
7 108 *Cronbach's*  $\alpha = 0.87$ ; follow-up: *Cronbach's*  $\alpha = 0.93$ ).

9 109 *Pain Class*: To exclude participants with current strong or disabling CLBP, a pain classification index  
10 110 was used at baseline (CPG pain classes). This scale grades pain intensity, pain disability and the  
11 111 number of days with limitations due to pain into 5 classes: 0) no pain, 1) pain with low intensity and  
12 112 low disability, 2) pain with low disability, but high intensity, 3) pain with high disability with few days  
13 113 of limitation in everyday life, 4) pain with high disability with severe limitation in everyday life [27].  
14 114 For the present study, only participants from pain classes 0 and 1 at baseline were included.  
15 115

16 116 Statistical analysis: After descriptive statistics calculation, four separate hierarchical regression  
17 117 analyses were conducted for each pain outcome using either education, job position, monthly  
18 118 personal net income or the multidimensional index as the respective predictors, while controlling for  
19 119 age and sex. These two variables are known for their high predictive value in the development of  
20 120 back pain [28]. Education, job position and income thereby were treated as dummy variables to  
21 121 reflect the categorical character of these variables. As most studies only use one indicator to  
22 122 represent SES, a separate model for each indicator was used here as this allowed for comparisons in  
23 123 variability if the other indicators had not been taken into account. Requirements of the regression  
24 124 analysis were tested with collinearity diagnosis, Durbin-Watson test and Kolmogorov Smirnov test  
25 125 for normality of residuals. All analyses were performed with IBM SPSS Statistics 21.  
26 126

## 27 127 **RESULTS**

28 128 **Descriptive statistics**: Sample characteristics (Tables 1 and 2) revealed 55% of respondents were  
29 129 women and on average the sample was middle-aged, but ranging from 19 to 65 years. Generally,  
30 130 participants were highly educated and held high job positions. Mean monthly net personal income  
31 131 was between 1,750 and 2,249€, while the average WS-index score was 14.9 on the scale from 3 to  
32 132 21. CLBP intensity and disability were low at both baseline and 6-month follow-up.

33 133 People with primary or lower secondary education, agricultural workers, machine operators and  
34 134 elementary job positions are excluded for further analysis because of the small sample size in the  
35 135 groups.  
36 136

37 137

38 138

39 139

139 Table 1: Sample characteristics. (Categorical variables, *N* = 367)

| Variable                              | N   | %    |                           | N   | %    |
|---------------------------------------|-----|------|---------------------------|-----|------|
| <b>EDUCATION</b>                      |     |      | <b>JOB POSITION</b>       |     |      |
| Primary education                     | 4   | 1.1  | Managers                  | 34  | 9.2  |
| Lower secondary education             | 4   | 1.1  | Professionals             | 97  | 26.4 |
| Upper secondary education             | 105 | 28.5 | Technicians               | 124 | 34.0 |
| Post-secondary-non tertiary education | 80  | 21.7 | Clerical Support Workers  | 37  | 10.1 |
| Tertiary education                    | 174 | 47.6 | Service and Sales Workers | 50  | 13.6 |
| <b>INCOME</b>                         |     |      | Agricultural Workers      | 1   | 0.3  |
| Under 1250€                           | 60  | 16.3 | Craft Workers             | 16  | 4.3  |
| 1250-1749€                            | 74  | 20.4 | Machine Operators         | 3   | 0.8  |
| 1750-2249€                            | 59  | 16.0 | Elementary Occupations    | 5   | 1.4  |
| 2250-2999€                            | 56  | 15.2 |                           |     |      |
| 3000-3999€                            | 65  | 17.7 |                           |     |      |
| 4000-4999€                            | 28  | 7.6  |                           |     |      |
| More than 5000€                       | 25  | 6.8  |                           |     |      |

140

141 Table 2: Sample characteristics. (Continuous variables, *N* = 367)

| Variable (Range)                        | M    | SD   | Min. | Max. |
|-----------------------------------------|------|------|------|------|
| Age (18 to 65)                          | 41.0 | 11.8 | 19   | 65   |
| Winkler-Scheuch Index (3 to 21)         | 14.9 | 2.9  | 8.2  | 20.4 |
| CPG pain intensity baseline (0 to 100)  | 21.0 | 13.8 | 0    | 47   |
| CPG pain intensity follow up (0 to 100) | 19.4 | 16.7 | 0    | 67   |
| CPG disability baseline (0 to 100)      | 9.9  | 12.7 | 0    | 63   |
| CPG disability follow up (0 to 100)     | 9.7  | 15.6 | 0    | 90   |
| CPG pain class baseline                 | 0.9  | 0.3  | 0    | 1    |

142 **Regression models:**

143 Regarding pain intensity (Table 3), only 'job position' and 'WS-index' significantly improved variance  
 144 explanation. Comparing variance explanation of respective SES indicators, the ranking was as follows:  
 145 job position (change in  $R^2 = 0.04$ ,  $p < 0.01$ ), WS-index (change in  $R^2 = 0.02$ ,  $p < 0.05$ ), education  
 146 (change in  $R^2 = 0.02$ , n.s.) and income (change in  $R^2 = 0.01$ , n.s.). Further, analysis revealed that  
 147 people with upper secondary education reported, on average, greater pain intensity compared to  
 148 people with tertiary education. Considering job position, technicians had significantly lower pain  
 149 intensity scores compared to managers. Income did not contribute to variance explanation, nor were  
 150 there any significant differences between income brackets. The multidimensional WS-index (included  
 151 as a continuous variable) improved the model significantly to confirm people with higher overall SES  
 152 reported less back pain.

153  
 154 Table 3: Four hierarchical regression models of different operationalisations predicting influence of SES on CPG  
 155 pain intensity score (higher values more pain). Controlled for age and sex ( $N = 352$ ).  $\Delta R^2$  indicates model  
 156 improvement after application of SES indicator.

| Model                                  | $\Delta R^2$ | Variable                                                                 | B     | SE B | p     |
|----------------------------------------|--------------|--------------------------------------------------------------------------|-------|------|-------|
| <b>Model 1:</b><br><b>Education</b>    | 0.01         | Upper Secondary Education<br>(Reference: tertiary education)             | 4.3   | 2.0  | 0.03* |
|                                        |              | Post-secondary non-tertiary education<br>(Reference: tertiary education) | 0.76  | 2.2  | 0.73  |
| <b>Model 2:</b><br><b>Job position</b> | 0.04**       | Professionals (Reference: managers)                                      | -3.6  | 2.0  | 0.13  |
|                                        |              | Technicians (Reference: managers)                                        | -4.5  | 2.2  | 0.05* |
|                                        |              | Clerical Support Workers (Reference: managers)                           | -0.36 | 3.2  | 0.91  |
|                                        |              | Service and Sales Workers<br>(Reference: managers)                       | 2.8   | 2.7  | 0.30  |
|                                        |              | Craft Workers (Reference: managers)                                      | 8.5   | 4.5  | 0.06  |
| <b>Model 3:</b><br><b>Income</b>       | 0.02         | Under 1250€ (Reference: more than 5000€)                                 | 5.2   | 4.2  | 0.22  |
|                                        |              | 1250-1749€ (Reference: more than 5000€)                                  | 1.9   | 3.9  | 0.63  |
|                                        |              | 1750-2249€ (Reference: more than 5000€)                                  | 2.1   | 4.0  | 0.61  |



|                 |       |                                         |      |     |        |
|-----------------|-------|-----------------------------------------|------|-----|--------|
|                 |       | 2250-2999€ (Reference: more than 5000€) | 5.9  | 3.9 | 0.14   |
|                 |       | 3000-3999€ (Reference: more than 5000€) | 0.8  | 3.9 | 0.83   |
|                 |       | 4000-4999€ (Reference: more than 5000€) | 5.0  | 4.5 | 0.27   |
| <b>Model 4:</b> | 0.02* |                                         | -0.9 | 0.3 | <0.01* |
| <b>WS-Index</b> |       |                                         |      |     |        |

\* $p < 0.05$ ; \*\* $p < 0.01$

157

158

159 Pain disability models yielded different results (Table 4). Education, job position and WS-index  
 160 explained a significant amount of variance, even sharing a stronger association in comparison to pain  
 161 intensity. The strongest predictor was job position (change in  $R^2 = 0.07$ ,  $p < 0.01$ ), followed by WS-  
 162 index (change in  $R^2 = 0.05$ ,  $p < 0.01$ ), then education (change in  $R^2 = 0.02$ ,  $p < 0.05$ ). Income had no  
 163 significant association with disability. People with professional, secondary education were  
 164 significantly more disabled due to back pain than people with tertiary education. Professionals  
 165 reported, in comparison with managers, significantly less impairment, while craft workers reported  
 166 significantly more. Although the income model did not improve variance explanation, people with an  
 167 income of less than 1,250€ reported significantly more impairment than people earning over 5000€.  
 168 People with a higher general SES (indicated by the multidimensional index) reported fewer  
 169 limitations due to back pain.

170

171 Table 4: Four hierarchical regression models of different operationalisations predicting influence of SES on CPG  
 172 pain disability score. Controlled for age and sex ( $N = 352$ ).  $\Delta R^2$  indicates model improvement after application  
 173 of SES indicator.

| Model                                  | $\Delta R^2$ | Variable                                                                 | B    | SE B | p       |
|----------------------------------------|--------------|--------------------------------------------------------------------------|------|------|---------|
| <b>Model 1:</b><br><b>Education</b>    | 0.02*        | Upper Secondary Education<br>(Reference: tertiary education)             | 5.8  | 2.0  | <0.01** |
|                                        |              | Post-secondary non-tertiary education<br>(Reference: tertiary education) | 2.6  | 2.2  | 0.22    |
| <b>Model 2:</b><br><b>Job position</b> | 0.07**       | Professionals (Reference: managers)                                      | -5.2 | 2.0  | <0.01** |
|                                        |              | Technicians (Reference: managers)                                        | -1.9 | 2.2  | 0.38    |
|                                        |              | Clerical Support Workers                                                 | 0.8  | 3.1  | 0.80    |

|                 |        |                                          |      |     |         |
|-----------------|--------|------------------------------------------|------|-----|---------|
|                 |        | (Reference: managers)                    |      |     |         |
|                 |        | Service and Sales Workers                | 2.4  | 2.7 | 0.36    |
|                 |        | (Reference: managers)                    |      |     |         |
|                 |        | Craft Workers (Reference: managers)      | 13.1 | 4.4 | <0.01** |
|                 |        | Under 1250€ (Reference: more than 5000€) | 8.8  | 4.1 | 0.03*   |
|                 |        | 1250-1749€ (Reference: more than 5000€)  | 4.9  | 3.9 | 0.21    |
|                 |        | 1750-2249€ (Reference: more than 5000€)  | 4.9  | 4.0 | 0.21    |
| <b>Model 3:</b> | 0.02   | 2250-2999€ (Reference: more than 5000€)  | 4.5  | 3.9 | 0.25    |
| <b>Income</b>   |        | 3000-3999€ (Reference: more than 5000€)  | 1.3  | 3.9 | 0.73    |
|                 |        | 4000-4999€ (Reference: more than 5000€)  | 2.5  | 4.4 | 0.57    |
| <b>Model 4:</b> | 0.05** |                                          |      |     |         |
| <b>WS-Index</b> |        |                                          | -1.3 | 0.3 | <0.01** |

\* $p < 0.05$ ; \*\* $p < 0.01$

## DISCUSSION

The purpose of this study was to report and compare the association of common SES indicators with the genesis of CLBP. Differences between these indicators were found, suggesting that SES indicators should be selected very carefully to avoid underestimation of SES's influence on CLBP. Our results show job position is the strongest predictor and should always be appraised in further research regarding CLBP. In contrast, income and education were determined to be suboptimal predictors of CLBP. In this respect, the current findings differ from studies in other health domains. For example, Geyer et al. [6] found education to be a much stronger predictor of diabetes than job position, and income was a better predictor of overall mortality compared to education and job position. Miech et al. [8] determined education to better predict subjective health than occupation, which was not corroborated by Geyer [9], who found income and job position to be superior. Again, this just illustrates the consequences of SES operationalization and the importance of considering all possible pathways connecting SES indicators and distinct health outcomes.

In line with our hypothesis, we confirmed the single indicator, job position, and the multidimensional index to be the most influential predictors of CLBP intensity. In detail, technicians reported significantly less CLBP intensity compared to managers. We believe this could be due to technicians' greater coping opportunities, but further research should be designed to answer such questions.

1  
2  
3 193 Income showed no significant associations and was not a reliable predictor for CLBP intensity.  
4 194 Education, as well, did not explain variance, although people with upper secondary education did  
5  
6 195 experience significantly more pain than people with tertiary education. Previous studies have  
7  
8 196 explained such findings to be influenced by better knowledge concerning healthy and preventative  
9  
10 197 behaviour [5]. We reasonable assumed that the WS-index would yield a significantly stronger  
11  
12 198 association than the single indicators; yet, this was not the case. Clearly, the addition of single SES  
13  
14 199 dimensions does not necessarily deliver a cumulative increase in the association, which was also  
15  
16 200 found to be the case by Geyer et al. [9], albeit in a different health domain. The overlapping of  
17  
18 201 indicators and mediating factors is potentially the problem here, leading to a shared influence on  
19  
20 202 CLBP for all indicators or effects of one indicator being counterbalanced by another.

21  
22 203 Focusing on associations between SES and CLBP disability, our results were again partly in  
23  
24 204 agreement with our hypotheses. Job position was, as expected, the most influential single predictor.  
25  
26 205 Professionals reported significantly less impairment due to CLBP compared to managers, while craft  
27  
28 206 workers reported more. In similar vein as the intensity results, we believe professionals have better  
29  
30 207 possibilities to adjust their work environments when experiencing CLBP, something neither managers  
31  
32 208 nor craft workers are afforded. The multidimensional index explained the second most variance in  
33  
34 209 CLBP disability. Again, we found it is wrong to assume the associations of single dimensions will sum  
35  
36 210 up. Education was also a significant predictor of CLBP disability, but not to the degree of job position  
37  
38 211 or WS-index. Similarly, to intensity, upper secondary educated people reported greater impairment  
39  
40 212 compared to tertiary educated people. Income could not significantly explain any variance, although  
41  
42 213 people in the lowest income bracket reported greater impairment in comparison with those from the  
43  
44 214 highest. Higher incomes may enable these people to acquire certain material resources, which could  
45  
46 215 reduce their disability in everyday life.

47  
48 216 To our knowledge this is the first study to compare the association of various SES indicators  
49  
50 217 with CLBP in a single sample. Our results confirm SES indicators should be selected carefully and not  
51  
52 218 used interchangeably. In our study, the pathways described in the model of Brunner and Marmot  
53  
54 219 [15] were used to predict associations between various SES indicators and CLBP. Our findings did  
55  
56 220 however contradict some of these predictions emphasizing just how difficult it is to predict *a priori*,  
57  
58 221 the most appropriate SES indicators.

59  
60 222 The results presented in this paper are afflicted by some limitations, namely the small group  
61  
62 223 sizes of primary and lower secondary educated people, agricultural workers, machine operators and  
63  
64 224 elementary occupations, which led to the exclusion of these groups. This reduces the explanatory  
65  
66 225 power of the results and may produce an underestimation in the predicted association of education  
67  
68 226 and job position. A replication study including more people from lower education and job groups  
69  
70 227 would assure more conclusive and generalizable results. Furthermore, the lowest income bracket

1  
2  
3 228 was relatively broad. We speculate income may have had a stronger association, had this category  
4 229 been split up. The study was also conducted in four study centres in Germany. Although Germany has  
5  
6 230 comparable numbers to other European countries regarding pain prevalence and severity rates [29],  
7  
8 231 country specific differences may lead to conflicting results in other countries. Additionally, not all  
9  
10 232 approaches to gauge SES were taken into account. Newer approaches, for example self-assessed  
11  
12 233 socioeconomic status [30, 31] or neighbourhood indicators [3], could improve future studies, but as  
13  
14 234 of yet, no statement can be made as to whether these approaches would have influenced our  
15  
16 235 results. In this study, income was evaluated as personal net income, but perhaps the material  
17  
18 236 situation of some would be better reflected by household income, which may hide some  
19  
20 237 heterogeneity.

21  
22 238 In conclusion, this study highlighted job position as an all-important dimension concerning  
23  
24 239 SES's association with CLBP. Further research aiming to prevent and reduce CLBP should therefore  
25  
26 240 focus on conditions that may be influenced by job positions.  
27  
28  
29  
30  
31  
32  
33  
34  
35  
36  
37  
38  
39  
40  
41  
42  
43  
44  
45  
46  
47  
48  
49  
50  
51  
52  
53  
54  
55  
56  
57  
58  
59  
60

1  
2  
3 242 **AUTHOR CONTRIBUTION**

4 243 All authors substantially contributed to the conception and realization of this article. MF conceived  
5  
6 244 and wrote the first draft of this manuscript and provided statistical analysis. JW and PW revised the  
7  
8 245 manuscript. PW was responsible for the psychometric design, analysis plan and conceived the social  
9  
10 246 methods of the multicentre study. All authors read and approved the final manuscript.

11 247

12 248 **COMPETING INTERESTS:**

13  
14 249 The authors declare that they have no competing interests.

15 250

16  
17 251 **FINANCIAL SUPPORT/FUNDING**

18  
19 252 This study is funded by the German Federal Institute of Sport Science on behalf of the Federal  
20  
21 253 Ministry of the Interior of Germany. It is conducted within MiSpEx – the National Research Network  
22  
23 254 for Medicine in Spine Exercise (grant-number: 080102A/11-14). The funder did not affect data  
24  
25 255 collection or the content of this manuscript.

26  
27 256

28  
29 257 **ETHICAL APPROVAL**

30 258 The study was approved by the independent ethics committee of University of Potsdam (Ethics  
31  
32 259 approval 36/2011).

33 260

34  
35 261 **DATA SHARING:**

36 262 No additional data available

37  
38 263

39  
40 264 **ACKNOWLEDGEMENTS**

41 265 Thanks go to the network principal investigator, Frank Mayer, and researchers of the MiSpEx  
42  
43 266 network, namely Adamantios Arampatzis, Marcus Schiltenswolf, Heidrun Beck, who were involved in  
44  
45 267 the planning and conducting of the multicenter study. We thank further MiSpEx colleagues, Winfried  
46  
47 268 Banzer, Christian Schneider, Karsten Dreinhöfer, Nikolaus Streich, Philipp Kasten, Petra Platen, u.v.m.  
48  
49 269 We thank both the technical and medical staff at our study clinics for their investment during the  
50  
51 270 study's conduction. We further thank Michael Rector for valuable support through linguistic  
52  
53 271 innovations and suggestions.

## REFERENCES

- 1 Braveman PA, Cubbin C, Egerter S, et al. Socioeconomic Status in Health: One Size Does Not Fit All. *JAMA* 2005;294(22):2879–88.
- 2 Nocon M, Keil T, Willich SN. Education, income, occupational status and health risk behaviour. *J Public Health* 2007;15(5):401–05.
- 3 Fliesser M, Klipker K, Wippert P-M. Zur Verwendung des sozioökonomischen Status in der Gesundheitsforschung am Beispiel Rückenschmerz - systematisches Review. *Gesundheitswesen* 2016.
- 4 Cundiff JM, Uchino BN, Smith TW, et al. Socioeconomic status and health: education and income are independent and joint predictors of ambulatory blood pressure. *J Behav Med* 2015;38(1):9–16.
- 5 Hradil S. Was prägt das Krankheitsrisiko- Schicht, Lage, Lebensstil? In: Richter M, Hurrelmann K, eds. *Gesundheitliche Ungleichheit: Grundlagen, Probleme, Perspektiven*, 2nd edn. Wiesbaden: VS, Verl. für Sozialwiss 2009:33–52.
- 6 Geyer S, Hemström O, Peter R, et al. Education, income, and occupational class cannot be used interchangeably in social epidemiology. Empirical evidence against a common practice. *J Epidemiol Community Health* 2006;60(9):804–10.
- 7 Stringhini S, Dugravot A, Kivimaki M, et al. Do different measures of early life socioeconomic circumstances predict adult mortality? Evidence from the British Whitehall II and French GAZEL studies. *J Epidemiol Community Health* 2011;65(12):1097–103.
- 8 Miech RA, Hauser RM. Socioeconomic Status and Health at Midlife: A Comparison of Educational Attainment with Occupation-Based Indicators. *Annals of Epidemiology* 2001;11(2):75–84.
- 9 Geyer S. Einzelindikator oder Index? Masse sozialer Differenzierung im Vergleich. *Gesundheitswesen* 2008;70(5):281–88.
- 10 Hoy D, Bain C, Williams G, et al. A systematic review of the global prevalence of low back pain. *Arthritis Rheum* 2012;64(6):2028–37.
- 11 van Hecke O, Torrance N, Smith BH. Chronic pain epidemiology - where do lifestyle factors fit in? *Br J Pain* 2013;7(4):209–17.
- 12 Goldberg DS, McGee SJ. Pain as a global public health priority. *BMC Public Health* 2011;11:770.
- 13 van Hecke O, Torrance N, Smith BH. Chronic pain epidemiology and its clinical relevance. *Br J Anaesth* 2013;111(1):13–18.
- 14 Latza U, Kohlmann T, Deck R, et al. Influence of Occupational Factors on the Relation Between Socioeconomic Status and Self-Reported Back Pain in a Population-Based Sample of German Adults With Back Pain. *Spine* 2000;25(11):1390–97.
- 15 Brunner G, Marmot MG. Social organisation, stress, and health. In: Marmot MG, Wilkinson RG, eds. *Social determinants of health*, 2nd edn. Oxford, New York: Oxford University Press 2011:6–30.
- 16 Bair MJ, Robinson RL, Katon W, et al. Depression and pain comorbidity: A literature review. *Arch Intern Med* 2003;163(20):2433–45.
- 17 Hoy D, Brooks P, Blyth F, et al. The Epidemiology of low back pain. *Best Pract Res Clin Rheumatol* 2010;24(6):769–81.
- 18 Chou R, Shekelle P. Will this patient develop persistent disabling low back pain? *JAMA* 2010;303(13):1295–302.
- 19 Brox JI, Storheim K, Holm I, et al. Disability, pain, psychological factors and physical performance in healthy controls, patients with sub-acute and chronic low back pain: a case-control study. *J Rehabil Med* 2005;37(2):95–99.

- 1  
2  
3 20 Melloh M, Elfering A, Egli Presland C, et al. Identification of prognostic factors for chronicity in  
4 patients with low back pain: a review of screening instruments. *Int Orthop* 2009;33(2):301–13.  
5 21 Wippert P-M, Puschmann A-K, Drießlein D, et al. Development of a Risk Stratification Index and  
6 a Risk Prevention Index for chronic low back pain in primary care. Focus: yellow flags (MiSpEx  
7 Network). *PAIN-Reports* pub. ahead.  
8 22 UNESCO. International standard classification of education: ISCED 2011. Montreal, Quebec:  
9 UNESCO Institute for Statistics 2012.  
10 23 Statistik Austria. ISCO 08- gemeinsame deutschsprachige Titel und Erläuterungen 2011.  
11 Available at:  
12 [http://www.statistik.at/wcm/idc/idcplg?IdcService=GET\\_PDF\\_FILE&dDocName=049974](http://www.statistik.at/wcm/idc/idcplg?IdcService=GET_PDF_FILE&dDocName=049974).  
13 24 Destatis. Demografische Standards 2017. Available at:  
14 <https://www.destatis.de/DE/Methoden/DemografischeRegionaleStandards/DemografischeStandardsInfo.html>.  
15 25 Lampert T, Kroll LE, Müters S, et al. Messung des sozioökonomischen Status in der Studie  
16 "Gesundheit in Deutschland aktuell" (GEDA). *Bundesgesundheitsblatt Gesundheitsforschung  
17 Gesundheitsschutz* 2013;56(1):131–43. 23275948.  
18 26 Hollinghead AB. Four Factor Index of Social Status. *Yale Journal of Sociology* 2011;8:21–52.  
19 27 Korff M, Ormel J, Keefe FJ, et al. Grading the severity of chronic pain. *Pain* 1992;50(2):133–49.  
20 28 Schepper EIT de, Damen J, van Meurs JBJ, et al. The association between lumbar disc  
21 degeneration and low back pain: The influence of age, gender, and individual radiographic  
22 features. *Spine* 2010;35(5):531–36.  
23 29 Breivik H, Collett B, Ventafridda V, et al. Survey of chronic pain in Europe: prevalence, impact  
24 on daily life, and treatment. *European Journal of Pain* 2006;10(4):287–333.  
25 30 Präg P, Mills MC, Wittek R. Subjective socioeconomic status and health in cross-national  
26 comparison. *Soc Sci Med* 2016;149:84–92.  
27 31 Hoebel J, Müters S, Kuntz B, et al. Messung des subjektiven sozialen Status in der  
28 Gesundheitsforschung mit einer deutschen Version der MacArthur Scale.  
29 *Bundesgesundheitsblatt Gesundheitsforschung Gesundheitsschutz* 2015;58(7):749–57 (accessed  
30 28 Aug 2015).  
31  
32  
33  
34  
35  
36  
37  
38  
39  
40  
41  
42  
43  
44  
45  
46  
47  
48  
49  
50  
51  
52  
53  
54  
55  
56  
57  
58  
59  
60



STROBE Statement—Checklist of items that should be included in reports of *cross-sectional studies*

|                              | Item No | Recommendation                                                                                                                                                                                                                                                                                                                                                                                                                                                                                          |
|------------------------------|---------|---------------------------------------------------------------------------------------------------------------------------------------------------------------------------------------------------------------------------------------------------------------------------------------------------------------------------------------------------------------------------------------------------------------------------------------------------------------------------------------------------------|
| <b>Title and abstract</b>    | 1       | (a) Indicate the study's design with a commonly used term in the title or the abstract<br><a href="#">Check Page 1</a><br>(b) Provide in the abstract an informative and balanced summary of what was done and what was found <a href="#">Check Page 2</a>                                                                                                                                                                                                                                              |
| <b>Introduction</b>          |         |                                                                                                                                                                                                                                                                                                                                                                                                                                                                                                         |
| Background/rationale         | 2       | Explain the scientific background and rationale for the investigation being reported<br><a href="#">Check Pages 3 and 4</a>                                                                                                                                                                                                                                                                                                                                                                             |
| Objectives                   | 3       | State specific objectives, including any prespecified hypotheses <a href="#">Check Page 4</a>                                                                                                                                                                                                                                                                                                                                                                                                           |
| <b>Methods</b>               |         |                                                                                                                                                                                                                                                                                                                                                                                                                                                                                                         |
| Study design                 | 4       | Present key elements of study design early in the paper <a href="#">Check Title and Pages 4, 5, 6</a>                                                                                                                                                                                                                                                                                                                                                                                                   |
| Setting                      | 5       | Describe the setting, locations, and relevant dates, including periods of recruitment, exposure, follow-up, and data collection <a href="#">Check Pages 4 and 5</a>                                                                                                                                                                                                                                                                                                                                     |
| Participants                 | 6       | (a) Give the eligibility criteria, and the sources and methods of selection of participants <a href="#">Check Pages 4 and 5</a>                                                                                                                                                                                                                                                                                                                                                                         |
| Variables                    | 7       | Clearly define all outcomes, exposures, predictors, potential confounders, and effect modifiers. Give diagnostic criteria, if applicable <a href="#">Check Pages 5 and 6</a>                                                                                                                                                                                                                                                                                                                            |
| Data sources/<br>measurement | 8*      | For each variable of interest, give sources of data and details of methods of assessment (measurement). Describe comparability of assessment methods if there is more than one group <a href="#">Check Pages 5 and 6</a>                                                                                                                                                                                                                                                                                |
| Bias                         | 9       | Describe any efforts to address potential sources of bias <a href="#">Check Page 6</a>                                                                                                                                                                                                                                                                                                                                                                                                                  |
| Study size                   | 10      | Explain how the study size was arrived at <a href="#">Check Page 4</a>                                                                                                                                                                                                                                                                                                                                                                                                                                  |
| Quantitative variables       | 11      | Explain how quantitative variables were handled in the analyses. If applicable, describe which groupings were chosen and why <a href="#">Check Page 6</a>                                                                                                                                                                                                                                                                                                                                               |
| Statistical methods          | 12      | (a) Describe all statistical methods, including those used to control for confounding<br><a href="#">Check Page 6</a><br>(b) Describe any methods used to examine subgroups and interactions <a href="#">Not applicable</a><br>(c) Explain how missing data were addressed <a href="#">Check Page 4</a><br>(d) If applicable, describe analytical methods taking account of sampling strategy<br><a href="#">Not applicable</a><br>(e) Describe any sensitivity analyses <a href="#">Not applicable</a> |
| <b>Results</b>               |         |                                                                                                                                                                                                                                                                                                                                                                                                                                                                                                         |
| Participants                 | 13*     | (a) Report numbers of individuals at each stage of study—eg numbers potentially eligible, examined for eligibility, confirmed eligible, included in the study, completing follow-up, and analysed <a href="#">Check Pages 4 and 5</a><br>(b) Give reasons for non-participation at each stage <a href="#">Check Pages 4 and 5</a><br>(c) Consider use of a flow diagram <a href="#">Not used</a>                                                                                                        |
| Descriptive data             | 14*     | (a) Give characteristics of study participants (eg demographic, clinical, social) and information on exposures and potential confounders <a href="#">Check Pages 6 and 7</a><br>(b) Indicate number of participants with missing data for each variable of interest<br><a href="#">Not applicable (all participants with missing data were excluded)</a>                                                                                                                                                |
| Outcome data                 | 15*     | Report numbers of outcome events or summary measures <a href="#">Check Table 2</a>                                                                                                                                                                                                                                                                                                                                                                                                                      |
| Main results                 | 16      | (a) Give unadjusted estimates and, if applicable, confounder-adjusted estimates and their precision (eg, 95% confidence interval). Make clear which confounders were adjusted for and why they were included <a href="#">Check Tables 3 and 4</a>                                                                                                                                                                                                                                                       |



|                          |    |                                                                                                                                                                                                 |
|--------------------------|----|-------------------------------------------------------------------------------------------------------------------------------------------------------------------------------------------------|
|                          |    | (b) Report category boundaries when continuous variables were categorized <b>Check Table 1</b>                                                                                                  |
|                          |    | (c) If relevant, consider translating estimates of relative risk into absolute risk for a meaningful time period <b>Not relevant</b>                                                            |
| Other analyses           | 17 | Report other analyses done—eg analyses of subgroups and interactions, and sensitivity analyses <b>Not applicable</b>                                                                            |
| <b>Discussion</b>        |    |                                                                                                                                                                                                 |
| Key results              | 18 | Summarise key results with reference to study objectives <b>Check Page 9</b>                                                                                                                    |
| Limitations              | 19 | Discuss limitations of the study, taking into account sources of potential bias or imprecision. Discuss both direction and magnitude of any potential bias <b>Check Page 11</b>                 |
| Interpretation           | 20 | Give a cautious overall interpretation of results considering objectives, limitations, multiplicity of analyses, results from similar studies, and other relevant evidence <b>Check Page 12</b> |
| Generalisability         | 21 | Discuss the generalisability (external validity) of the study results <b>Check Page 11</b>                                                                                                      |
| <b>Other information</b> |    |                                                                                                                                                                                                 |
| Funding                  | 22 | Give the source of funding and the role of the funders for the present study and, if applicable, for the original study on which the present article is based <b>Check Page 13</b>              |

\*Give information separately for exposed and unexposed groups.

**Note:** An Explanation and Elaboration article discusses each checklist item and gives methodological background and published examples of transparent reporting. The STROBE checklist is best used in conjunction with this article (freely available on the Web sites of PLoS Medicine at <http://www.plosmedicine.org/>, Annals of Internal Medicine at <http://www.annals.org/>, and Epidemiology at <http://www.epidem.com/>). Information on the STROBE Initiative is available at [www.strobe-statement.org](http://www.strobe-statement.org).
